# Supplementary material for: Phosphaguanidinate yttrium carbene, carbyne and carbide complexes: three distinct C1 functionalities
Source: Royal Society of Chemistry journal article supplement (doi:10.1039/d4dt03060e), 2024-12-02
Supplement: d4dt03060e1.pdf [file d4dt03060e1.pdf]

## ***Supporting Information***

### **Phosphaguanidinate Yttrium Carbene, Carbyne and Carbide Complexes: Three Distinct C1 Functionalities**

Wen Jiang,<sup>[a]</sup> Lixin Zhang\*<sup>[a]</sup>

---

[a] Department of Chemistry, Shanghai Key Laboratory of Molecular Catalysis and Innovative Materials, Jiangwan Campus, Fudan University, Shanghai, 200438, China.

#### **Tables of Contents**

General procedure (page 2)

NMR spectra of selected complexes (page 3 to 19)

Molecular structures of selected complexes (page 20 to 29)

Crystal data of selected complexes (page 30 to 32)

References (page 33)

**General.** All manipulations were performed with rigorous exclusion of air and water, using Schlenk techniques or an MBRAUN glovebox (Unilab Mbraun; <1 ppm O<sub>2</sub>, <1 ppm H<sub>2</sub>O). Solvents (toluene, hexane, and THF) were purified using Grubbs-type columns (MBraun SPS-800, solvent purification system), dried over fresh Na chips and stored in glovebox. Bis(2,6-diisopropylphenyl) carbodiimide was obtained from Tokyo Chemical Industry Co., Ltd and used without purification. CH<sub>3</sub>C<sub>6</sub>H<sub>4</sub>NMe<sub>2</sub>-*o* was purchased from Sigma-Aldrich and used without purification. Ph<sub>2</sub>PH and <sup>n</sup>BuLi (2.5 mol L<sup>-1</sup> in hexane) were purchased from Engery Chemical Co., Ltd and used without purification. The AlMe<sub>3</sub> (1 mol L<sup>-1</sup> in hexane) was purchased from J&K Co., Ltd and used without purification. Benzene-d<sub>6</sub> was obtained from J&K Co., Ltd and dried by using sodium chips. The synthesis of (Ph<sub>2</sub>P)[C(NR)(NHR)] (R = 2,6-(<sup>i</sup>Pr<sub>2</sub>)C<sub>6</sub>H<sub>3</sub>) refers to reported literature.<sup>1</sup> <sup>1</sup>H, <sup>13</sup>C{<sup>1</sup>H}, <sup>31</sup>P{<sup>1</sup>H}, <sup>13</sup>C DEPT-135 and <sup>1</sup>H-<sup>13</sup>C HMQC NMR spectra of complexes were recorded using a JEOL ECA-400 NMR spectrometer (FT, 400 MHz for <sup>1</sup>H; 100 MHz for <sup>13</sup>C, 162 MHz for <sup>31</sup>P) at room temperature. The combustion method was used for the carbon, hydrogen and nitrogen analyses on an Elementar Vario EL III analyzer at Fudan Univerisity (China).

## NMR spectra of all complexes

The solid samples were dissolved in  $C_6D_6$ , and then transferred into a J-Young NMR tube in the glove-box. The  $^1H$ ,  $^{13}C\{^1H\}$ ,  $^{31}P\{^1H\}$ ,  $^{13}C$  DEPT-135 and  $^1H$ - $^{13}C$  HMQC NMR spectra were recorded on a JEOL ECA-400 NMR spectrometer (FT, 400 MHz for  $^1H$ ; 100 MHz for  $^{13}C$ , 162 MHz for  $^{31}P$ ) in  $C_6D_6$  at room temperature.

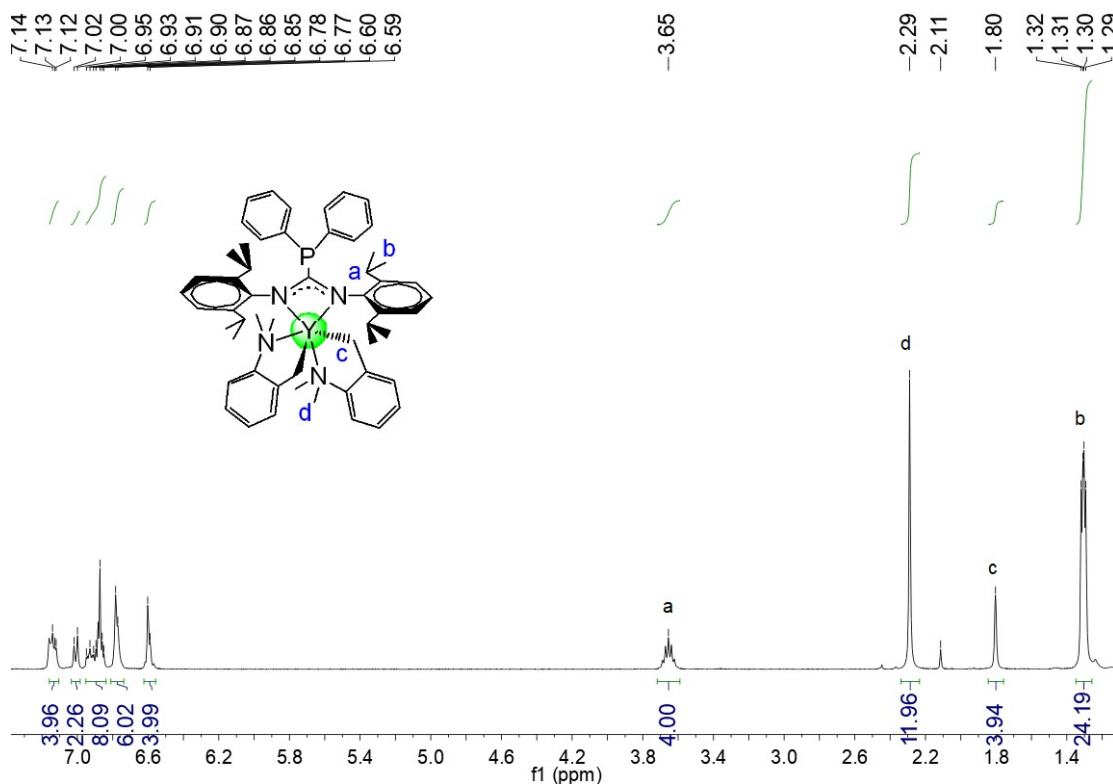

**Figure S1.**  $^1H$  NMR spectrum of **1-Y** obtained in  $C_6D_6$  at room temperature.

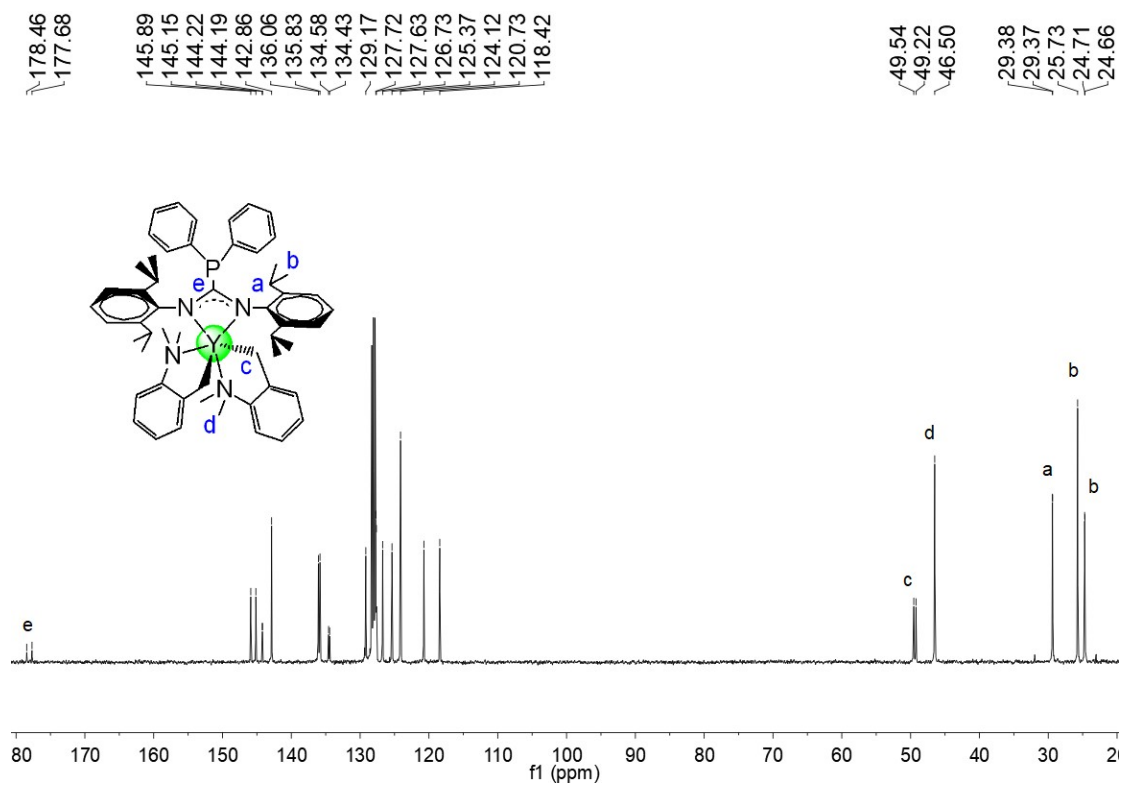

**Figure S2.**  $^{13}\text{C}\{^1\text{H}\}$  NMR spectrum of **1-Y** obtained in  $\text{C}_6\text{D}_6$  at room temperature.

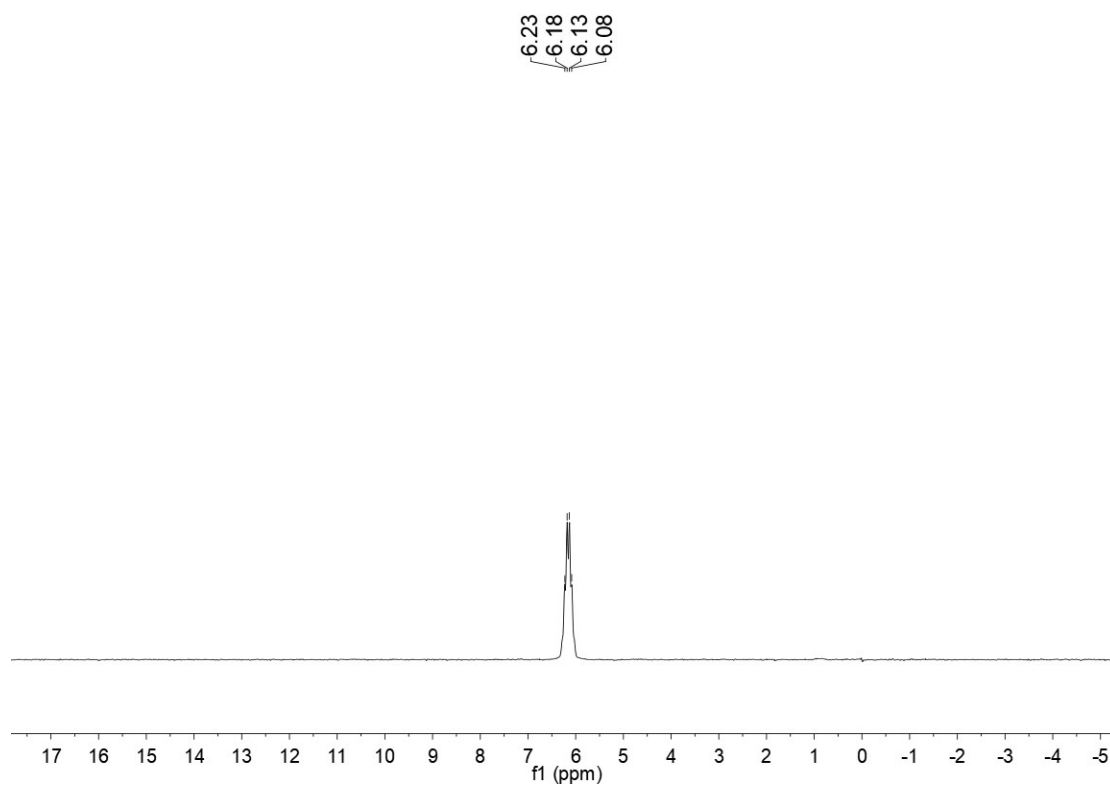

**Figure S3.**  $^{31}\text{P}\{^1\text{H}\}$  NMR spectrum of **1-Y** obtained in  $\text{C}_6\text{D}_6$  at room temperature.

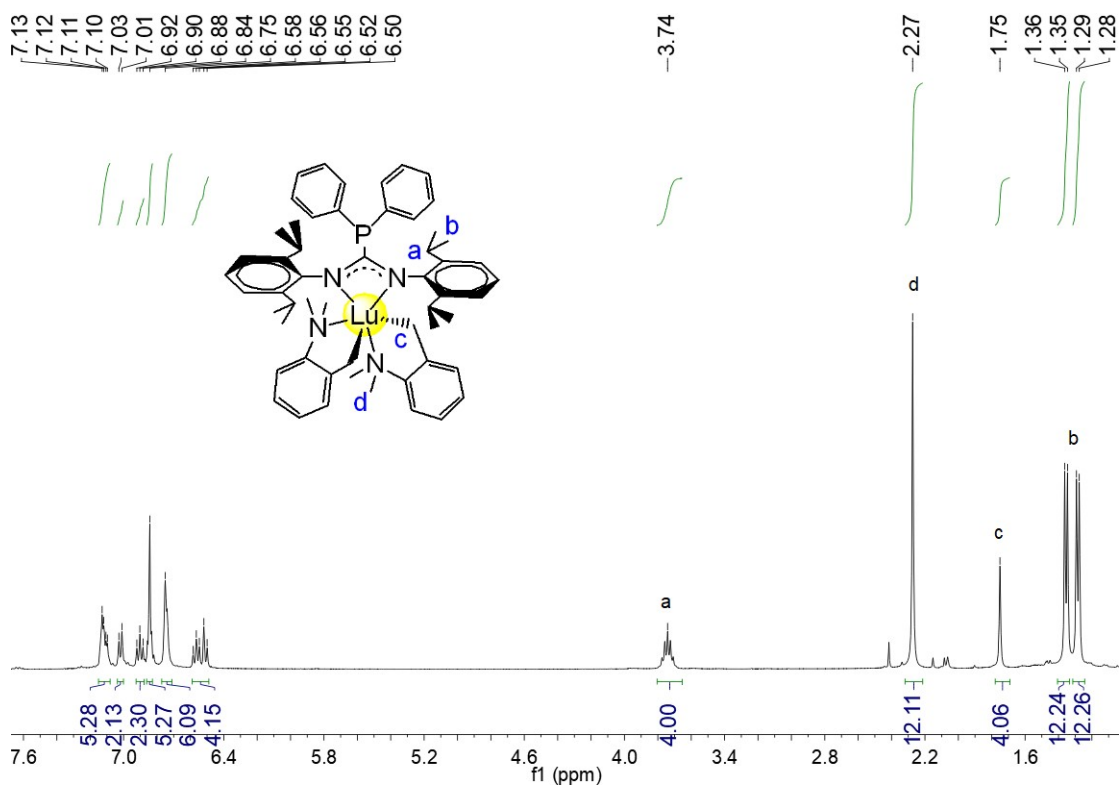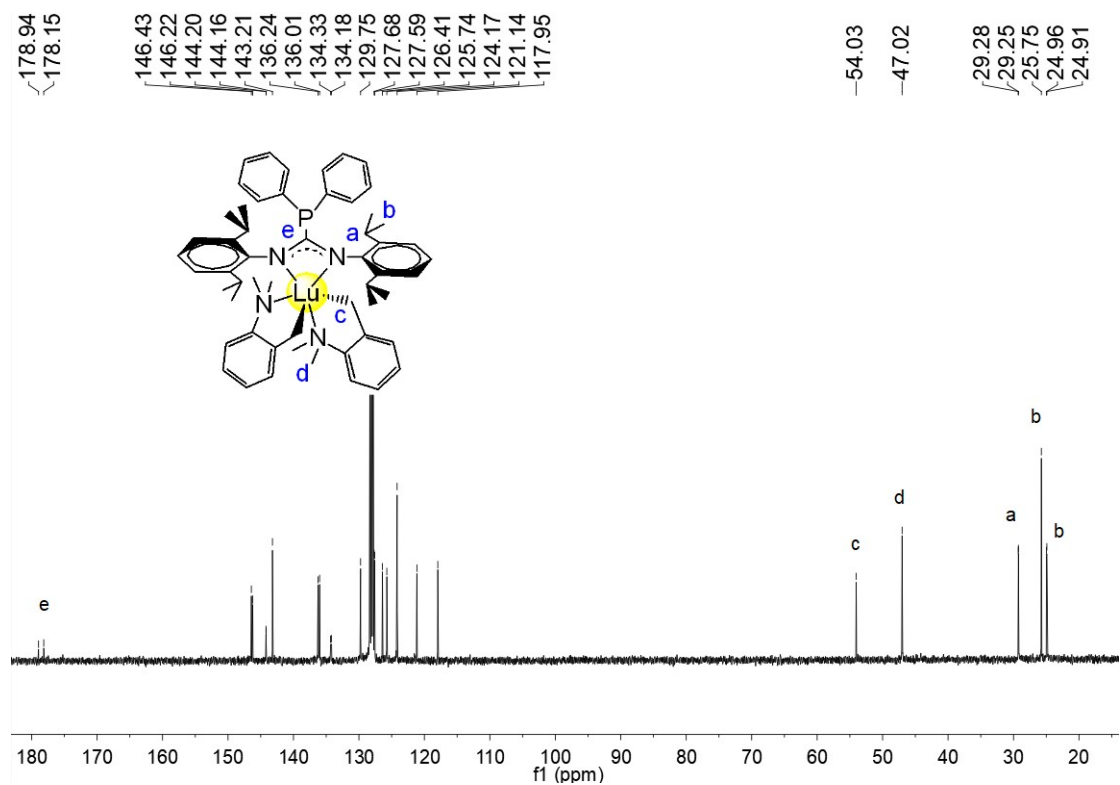

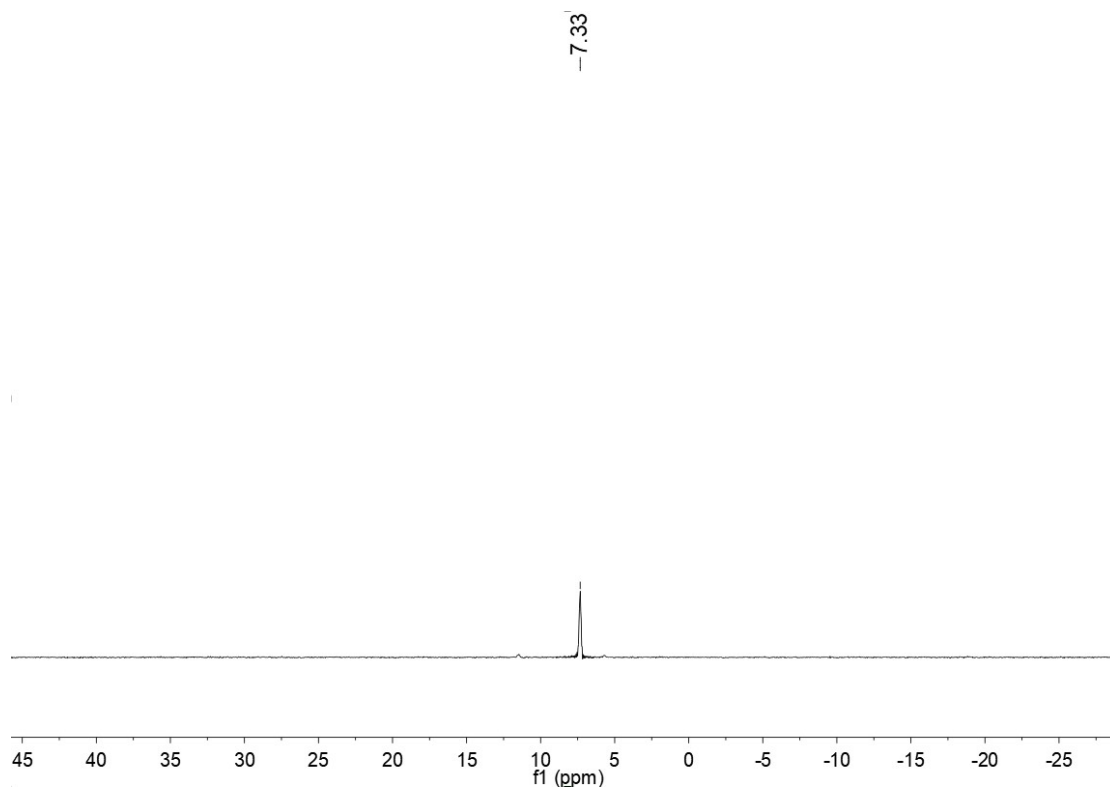

**Figure S6.**  $^{31}\text{P}\{^1\text{H}\}$  NMR spectrum of **1-Lu** obtained in  $\text{C}_6\text{D}_6$  at room temperature.

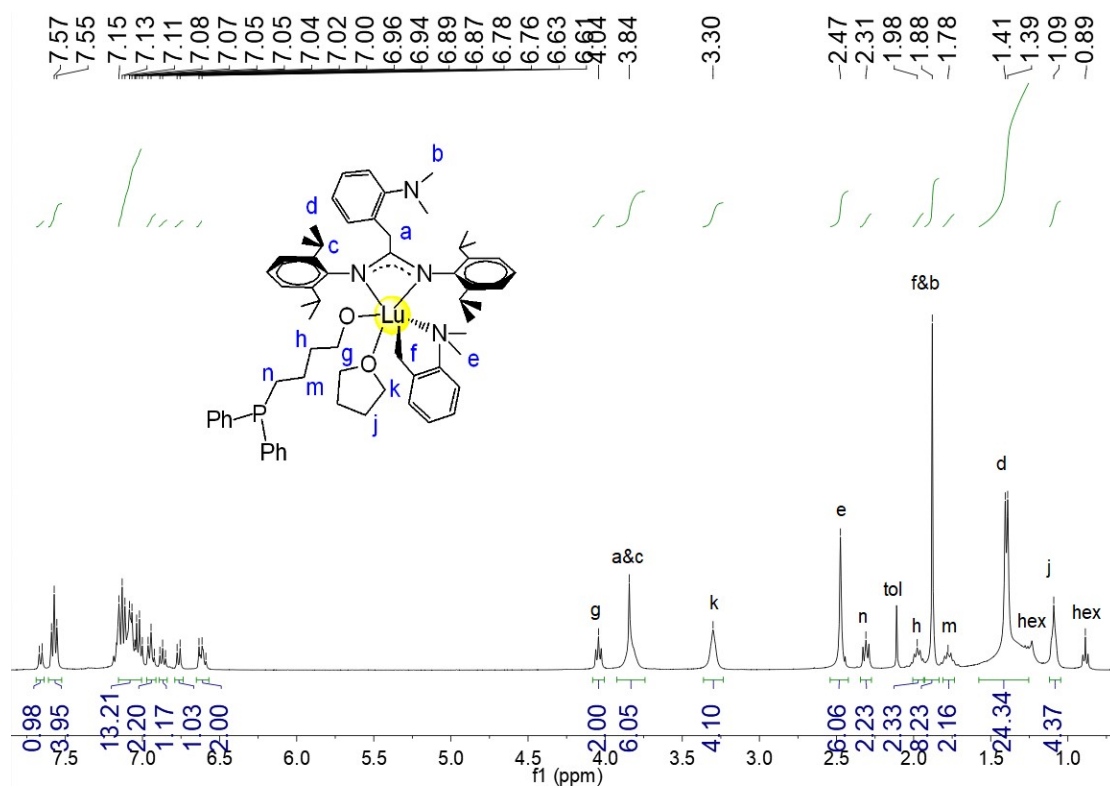

**Figure S7.**  $^1\text{H}$  NMR spectrum of **2** obtained in  $\text{C}_6\text{D}_6$  at room temperature.

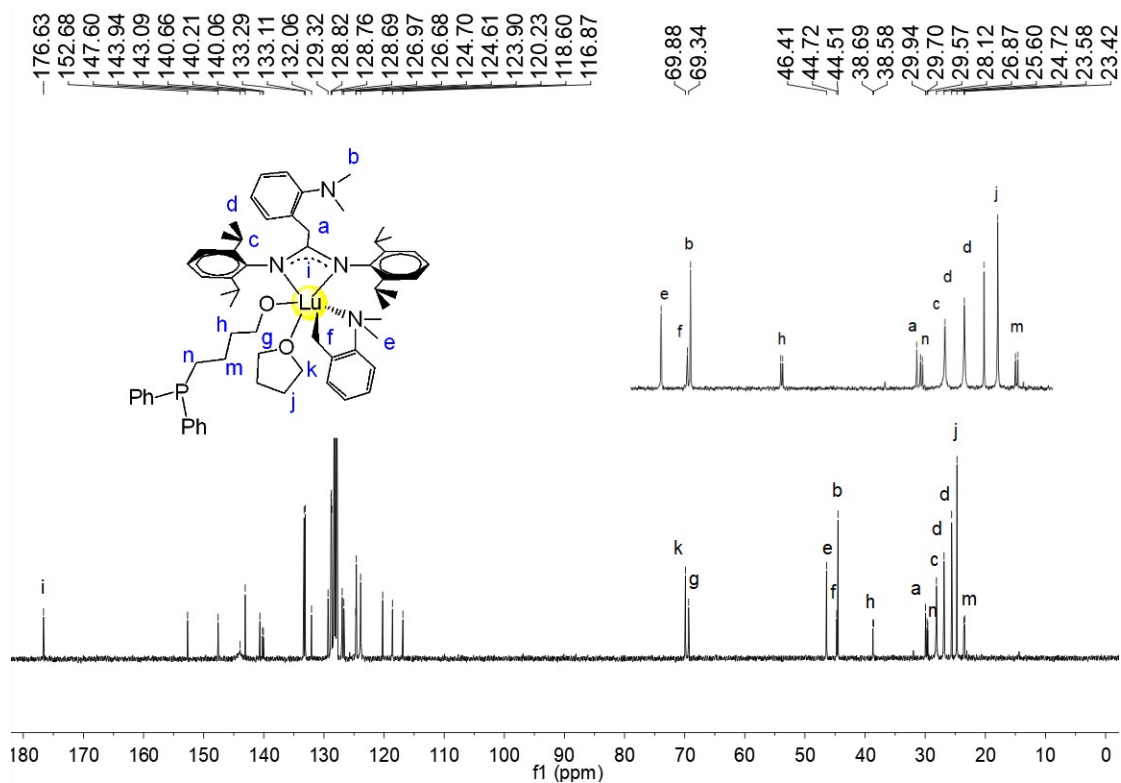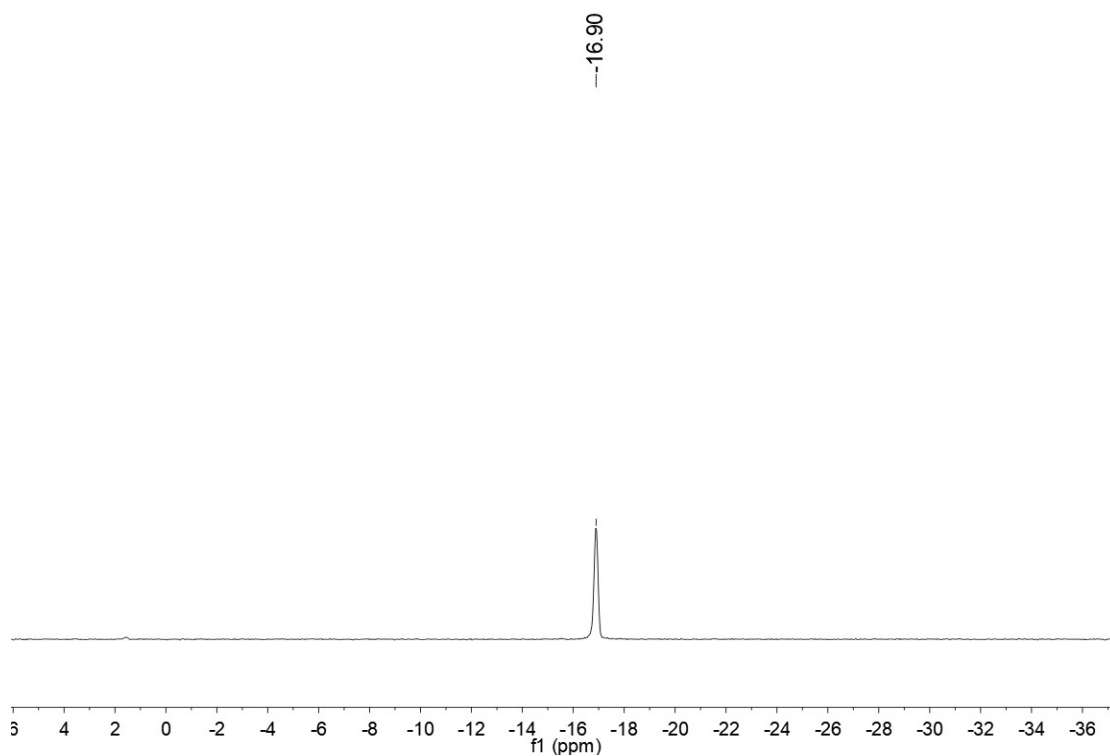

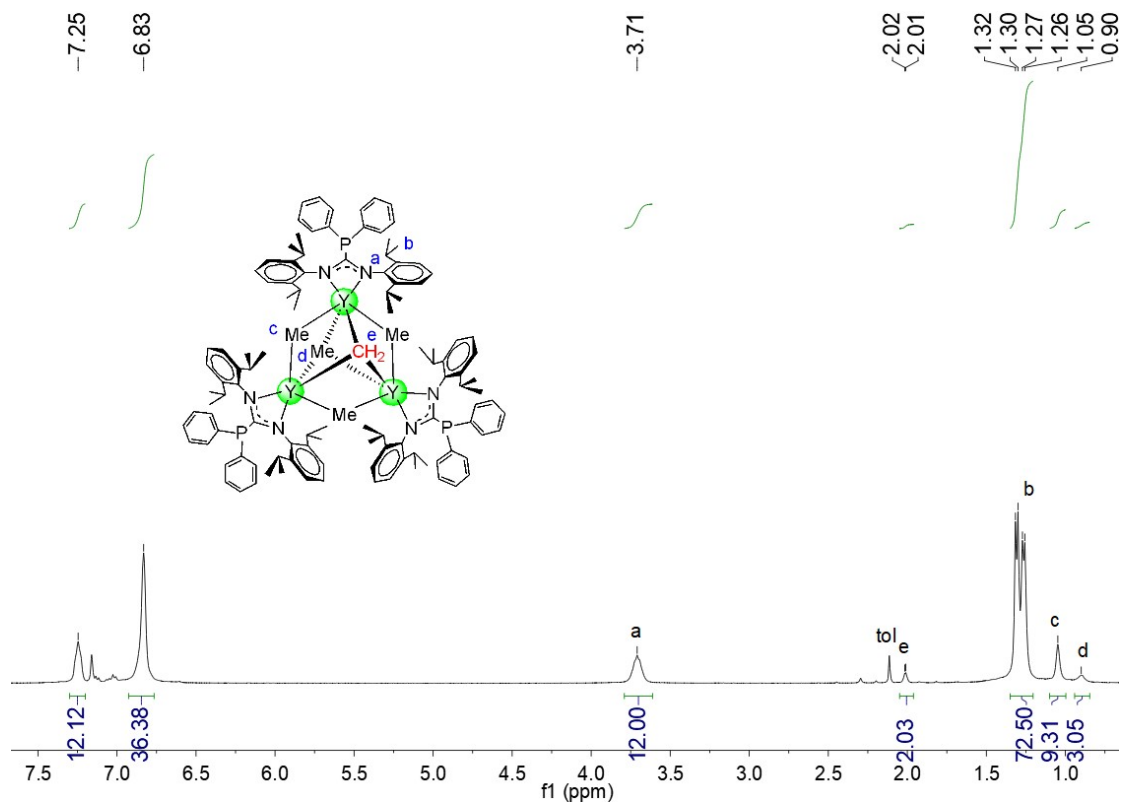

**Figure S10.**  $^1\text{H}$  NMR spectrum of **3** obtained in  $\text{C}_6\text{D}_6$  at room temperature.

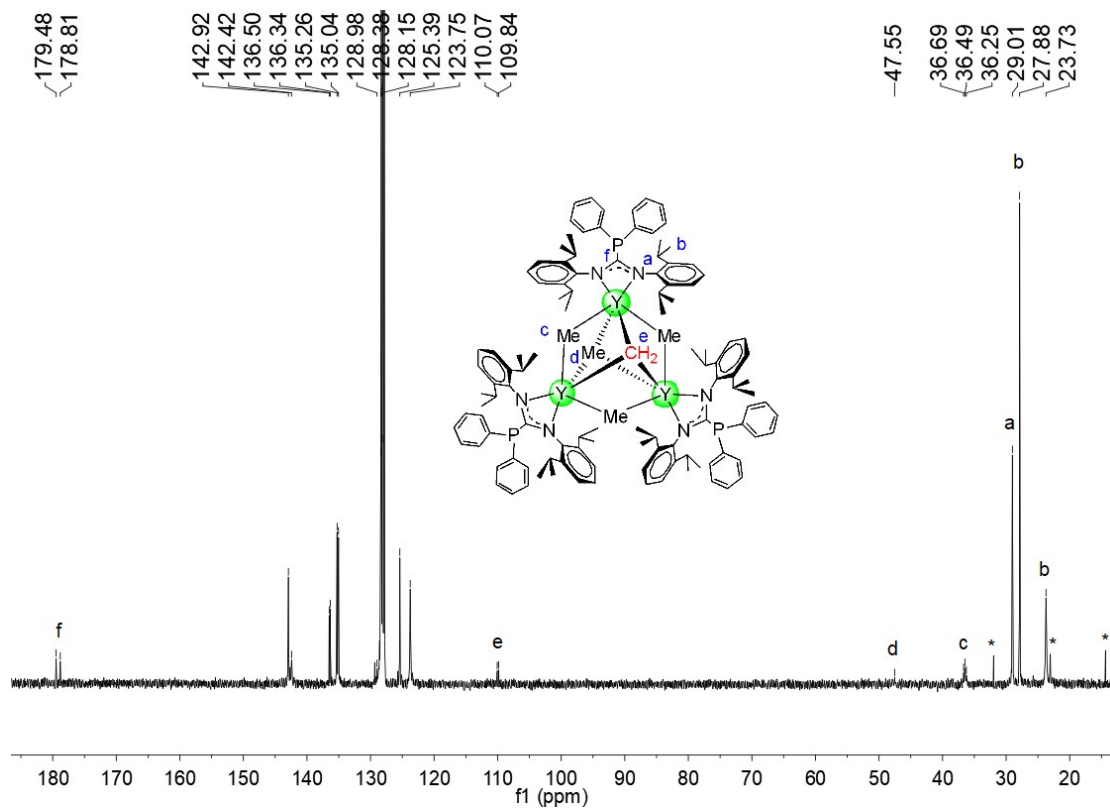

**Figure S11.**  $^{13}\text{C}\{^1\text{H}\}$  NMR spectrum of **3** obtained in  $\text{C}_6\text{D}_6$  at room temperature.



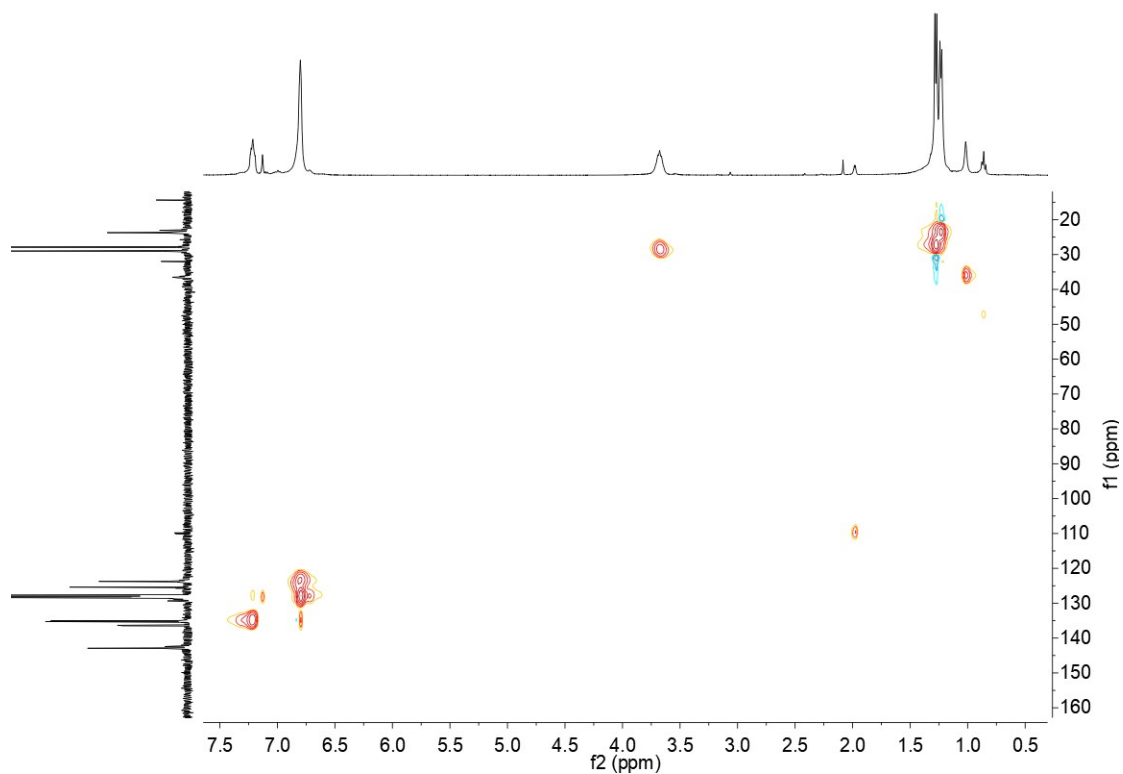

**Figure S12.** Two-dimensional  $^1\text{H}$ - $^{13}\text{C}$  HMQC NMR spectrum of complex **3** ( $^1\text{H}$  NMR spectrum (400 MHz) on the top,  $^{13}\text{C}\{^1\text{H}\}$  NMR spectrum (100 MHz) on the left).

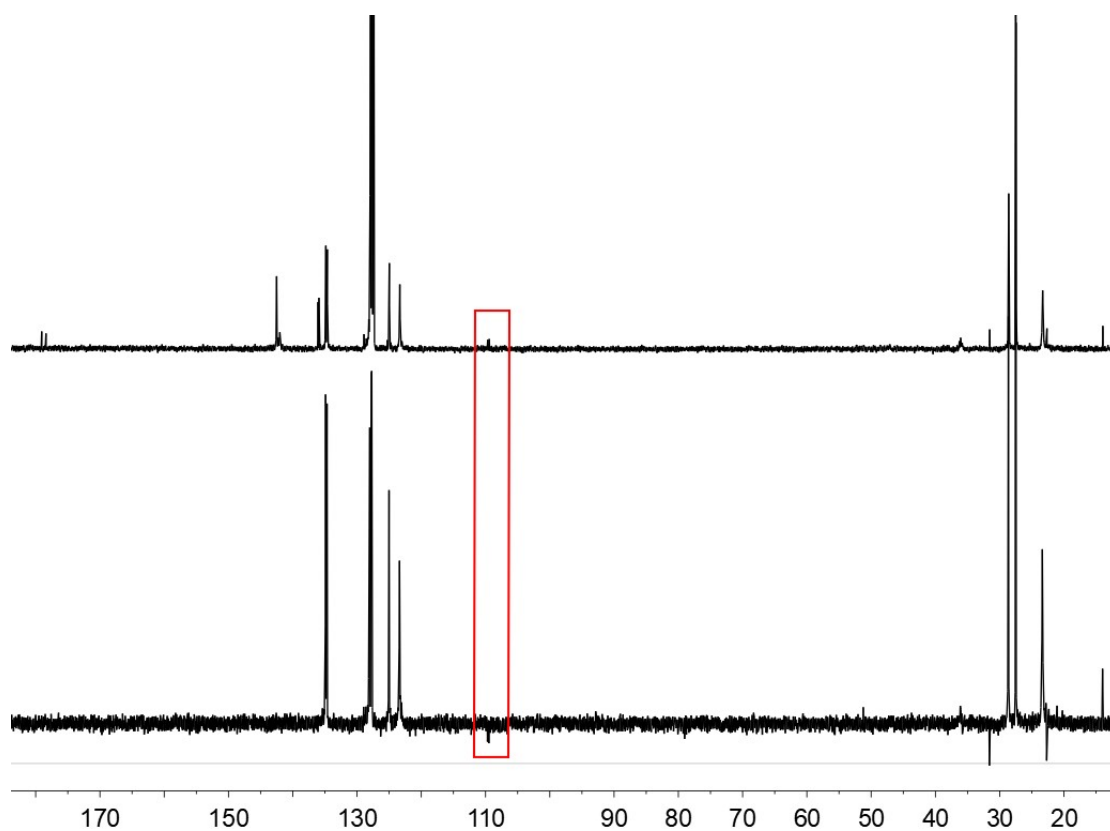

**Figure S13.**  $^{13}\text{C}$  DEPT-135 NMR spectrum of **3** obtained in  $\text{C}_6\text{D}_6$  at room temperature.

-1.38

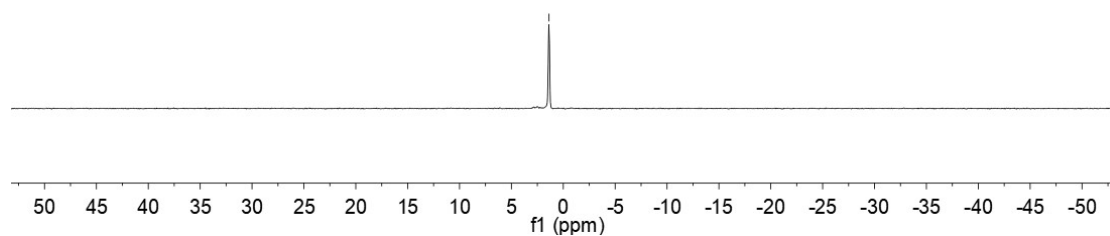

Figure S14.  $^{31}\text{P}\{^1\text{H}\}$  NMR spectrum of **3** obtained in  $\text{C}_6\text{D}_6$  at room temperature.

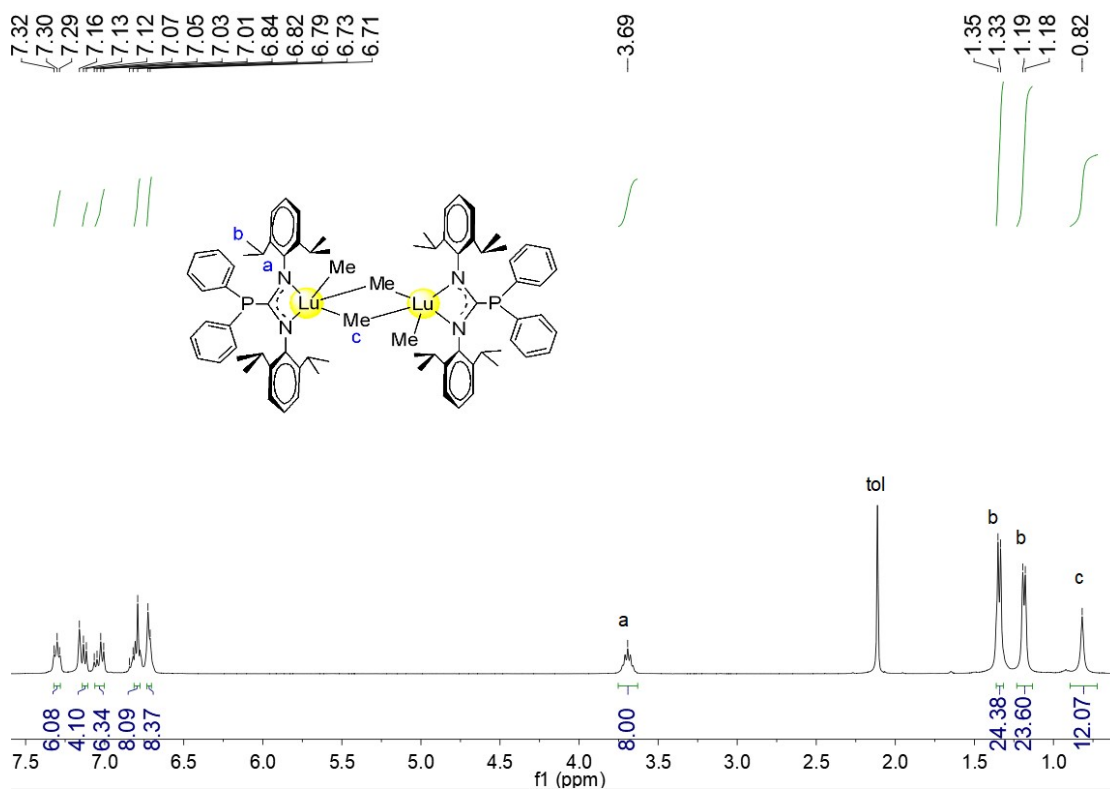

Figure S15.  $^1\text{H}$  NMR spectrum of **4** obtained in  $\text{C}_6\text{D}_6$  at room temperature.

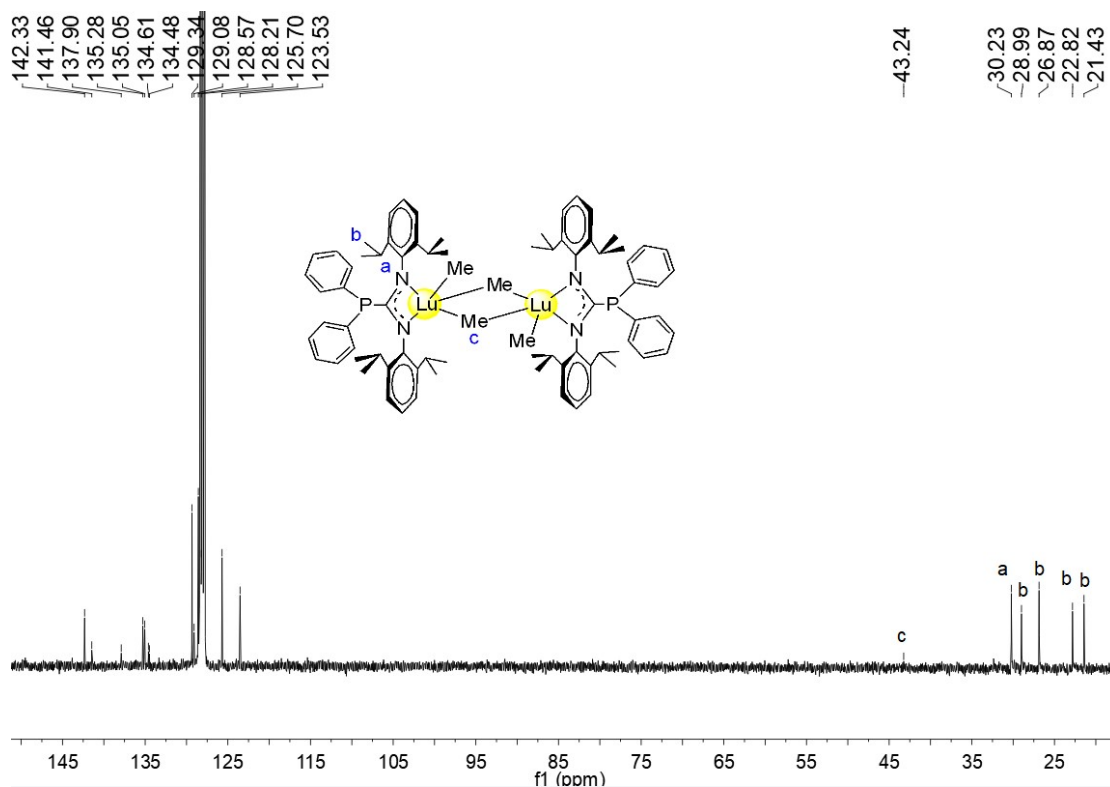

**Figure S16.**  $^{13}\text{C}\{^1\text{H}\}$  NMR spectrum of **4** obtained in  $\text{C}_6\text{D}_6$  at room temperature.

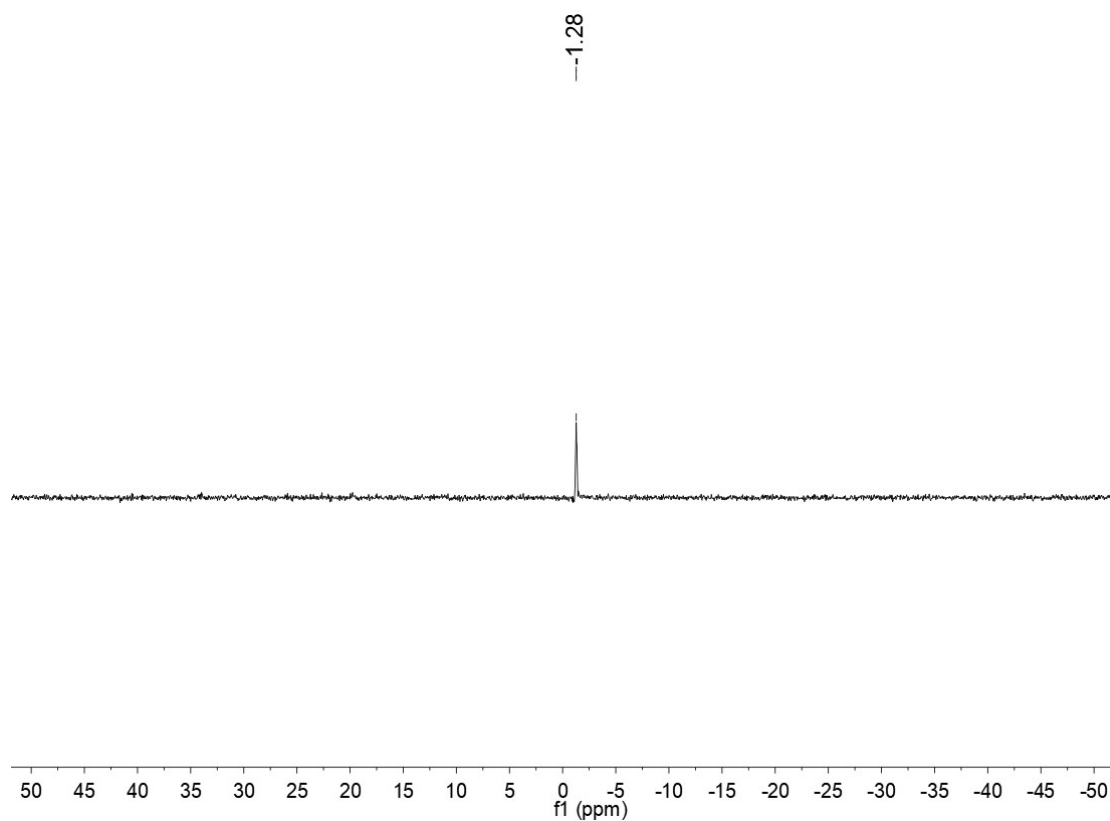

**Figure S17.**  $^{31}\text{P}\{^1\text{H}\}$  NMR spectrum of **4** obtained in  $\text{C}_6\text{D}_6$  at room temperature.

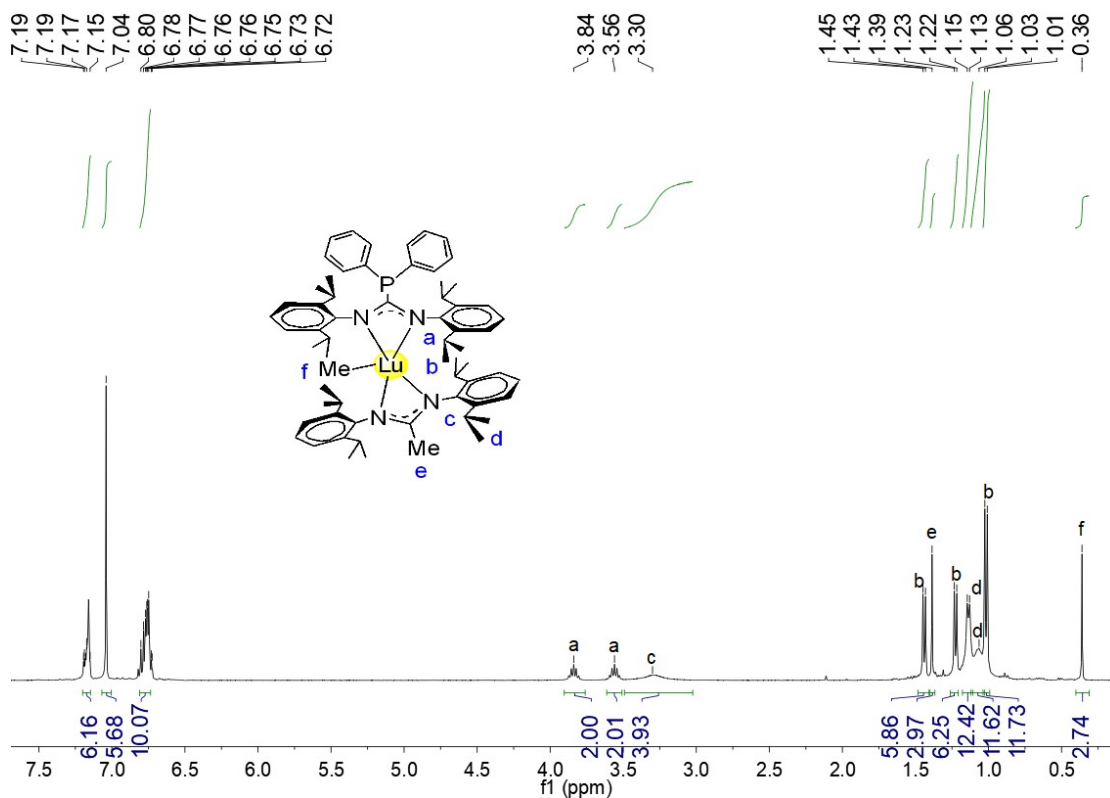

**Figure S18.**  $^1\text{H}$  NMR spectrum of **5** obtained in  $\text{C}_6\text{D}_6$  at room temperature.

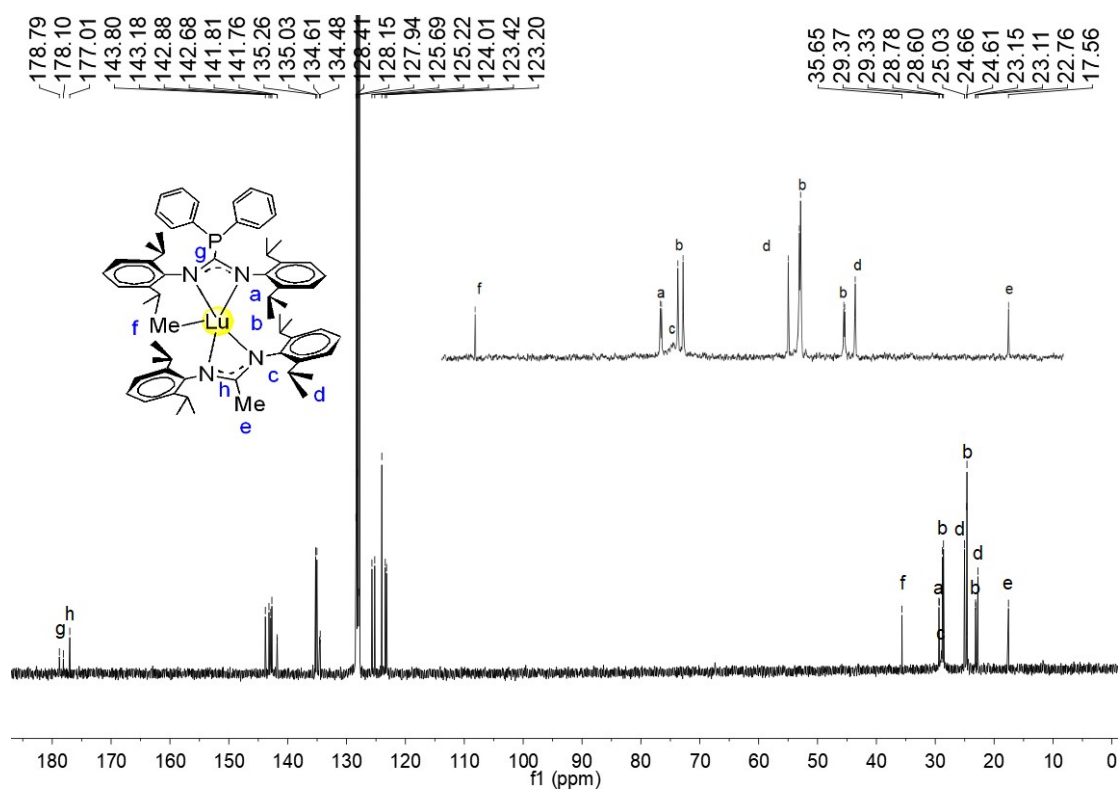

**Figure S19.**  $^{13}\text{C}\{^1\text{H}\}$  NMR spectrum of **5** obtained in  $\text{C}_6\text{D}_6$  at room temperature.

-5.26

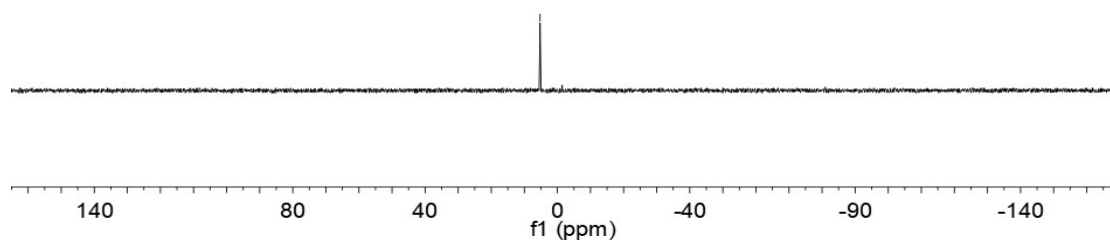

**Figure S20.**  $^{31}\text{P}\{^1\text{H}\}$  NMR spectrum of **5** obtained in  $\text{C}_6\text{D}_6$  at room temperature.

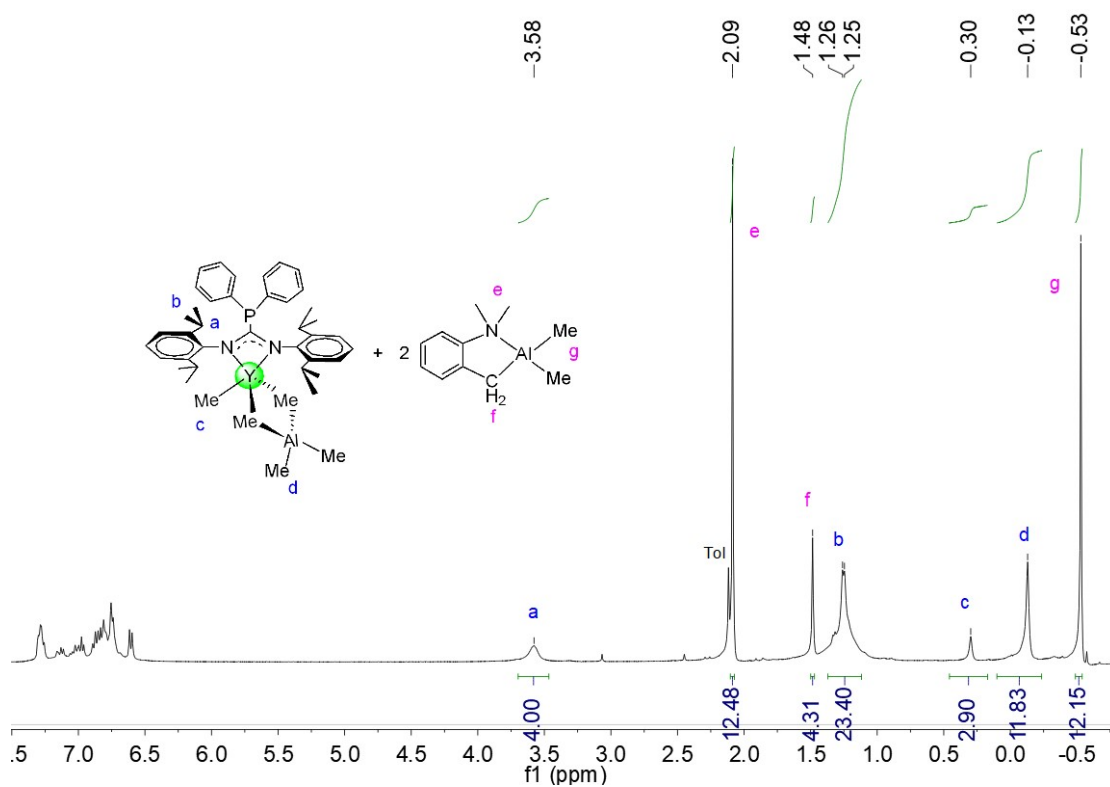

**Figure S21.** The *in situ*  $^1\text{H}$  NMR spectrum of **6-Y** obtained in  $\text{C}_6\text{D}_6$  at room temperature.

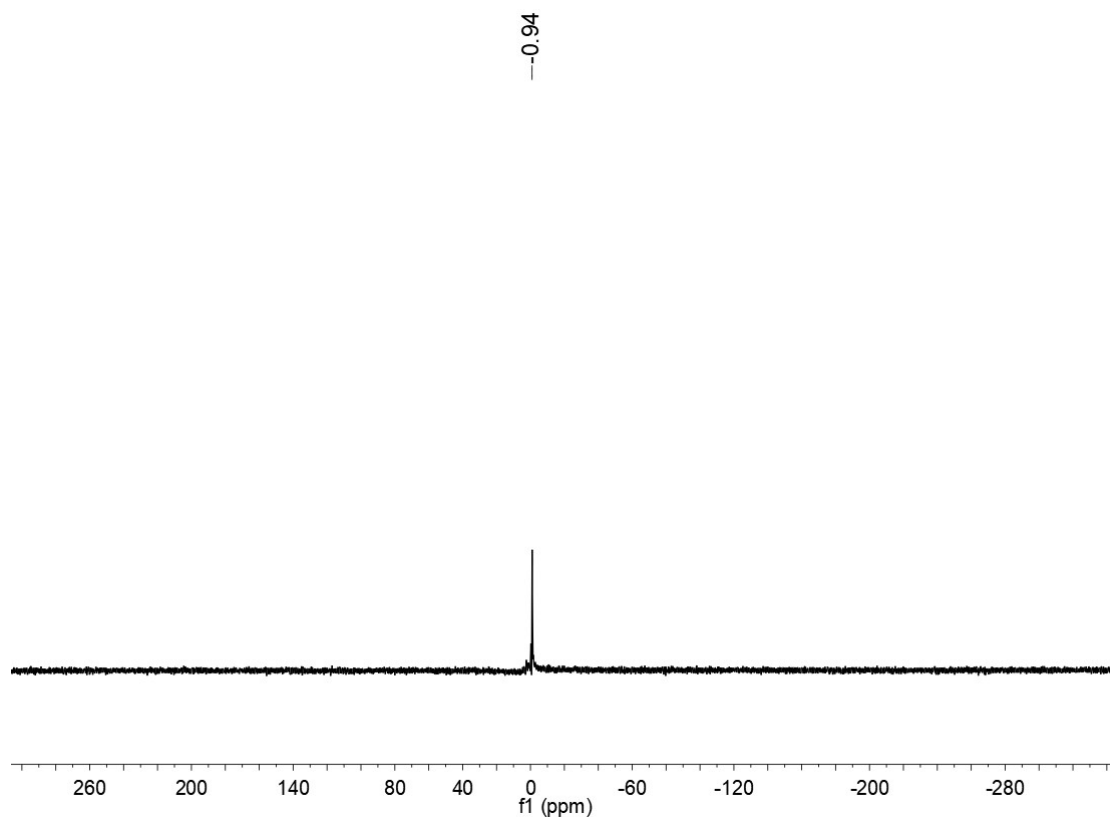

**Figure S22.** The *in situ*  $^{31}\text{P}\{^1\text{H}\}$  NMR spectrum of **6-Y** obtained in  $\text{C}_6\text{D}_6$  at room temperature.

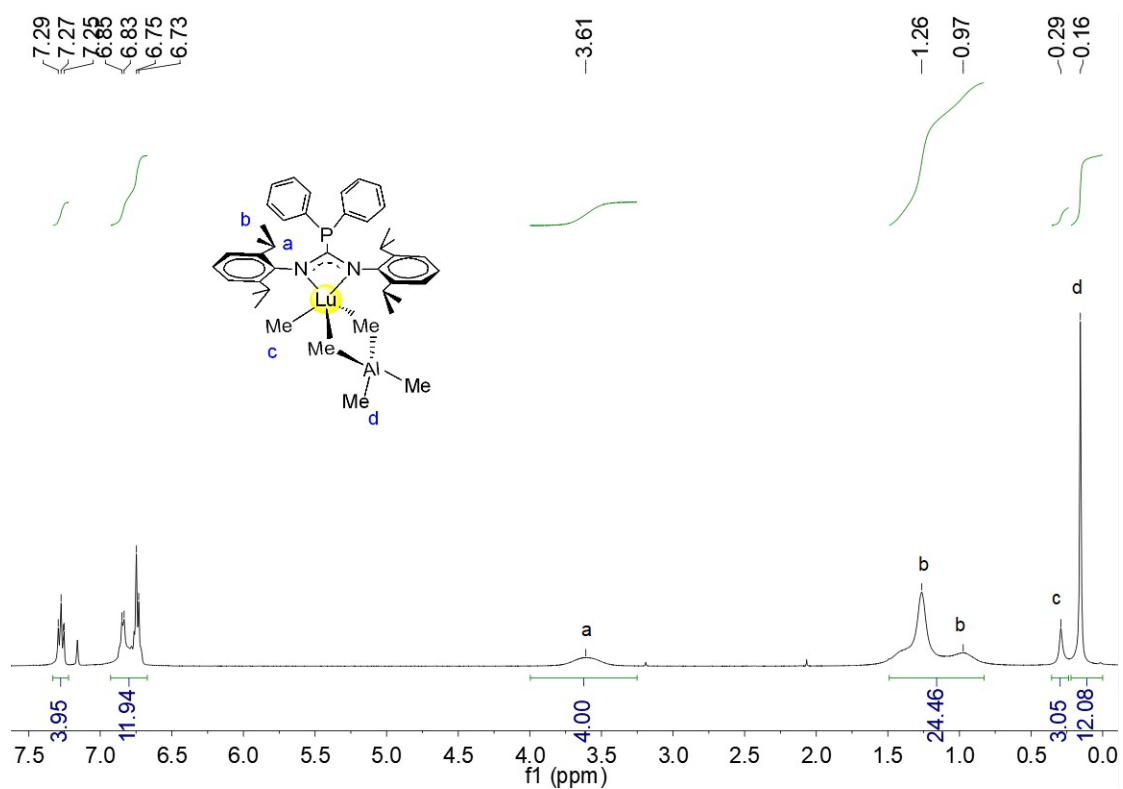

**Figure S23.**  $^1\text{H}$  NMR spectrum of **6-Lu** obtained in  $\text{C}_6\text{D}_6$  at room temperature.

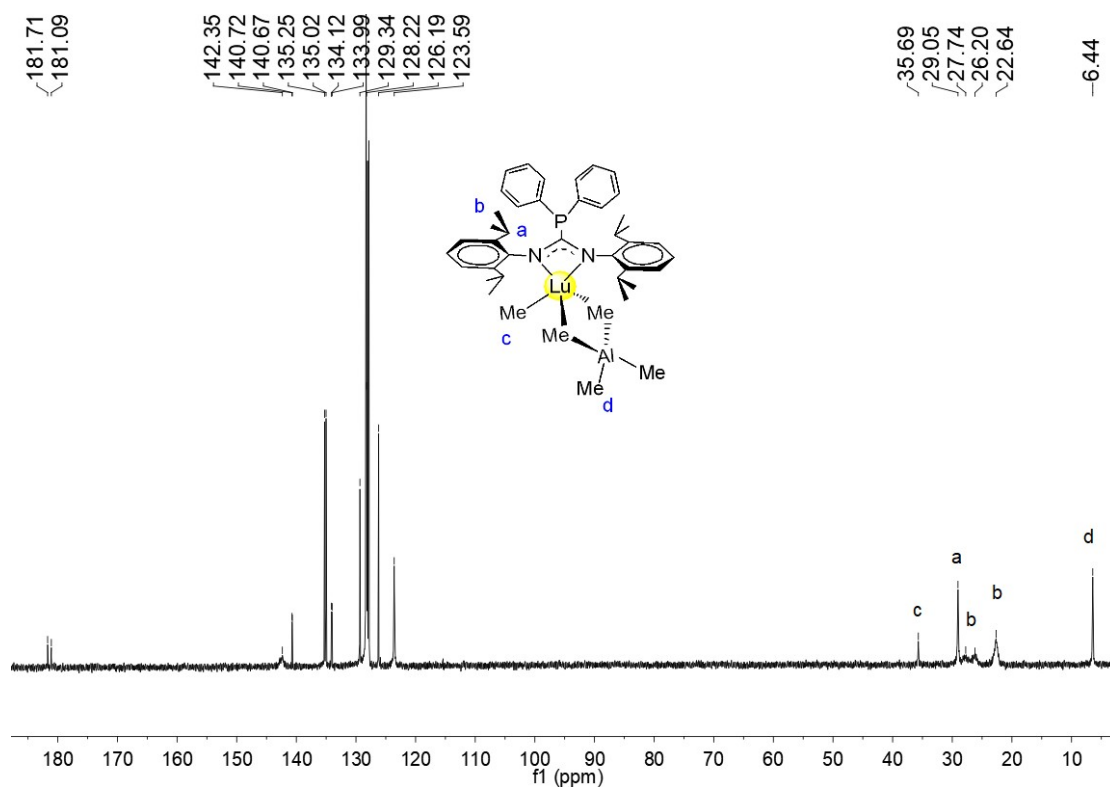

**Figure S24.**  $^{13}\text{C}\{^1\text{H}\}$  NMR spectrum of **6-Lu** obtained in  $\text{C}_6\text{D}_6$  at room temperature.

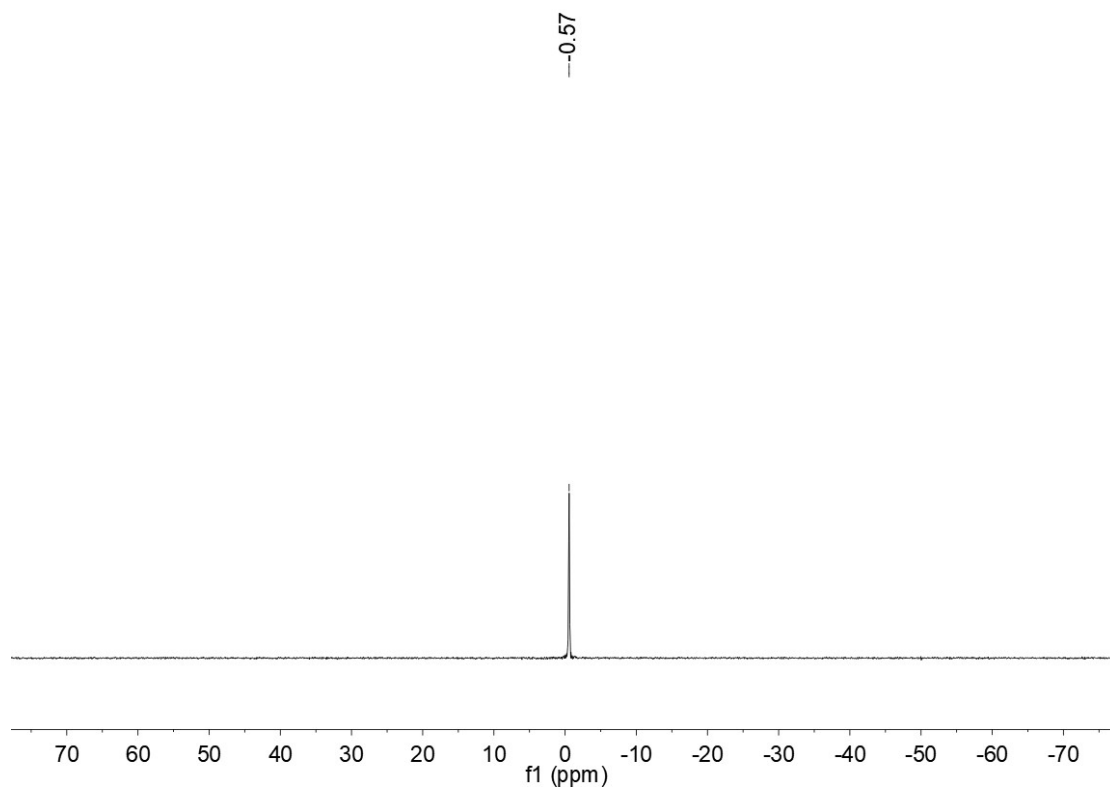

**Figure S25.**  $^{31}\text{P}\{^1\text{H}\}$  NMR spectrum of **6-Lu** obtained in  $\text{C}_6\text{D}_6$  at room temperature.

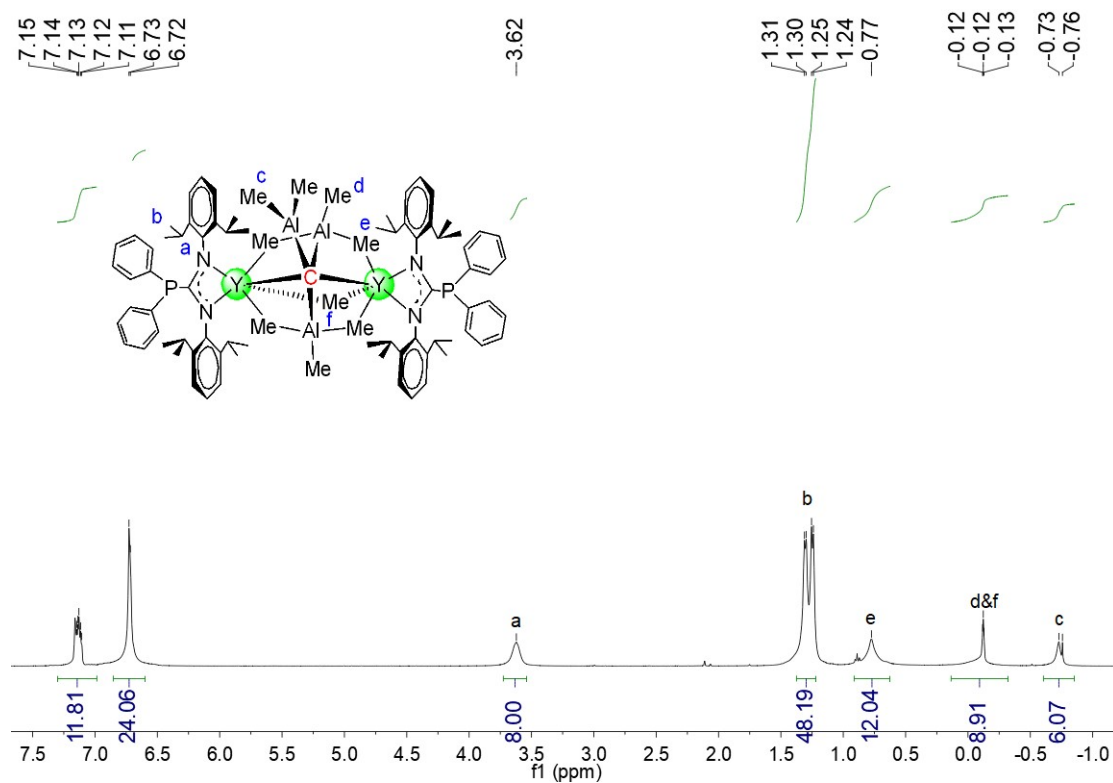

Figure S26.  $^1\text{H}$  NMR spectrum of **8** obtained in  $\text{C}_6\text{D}_6$  at room temperature.

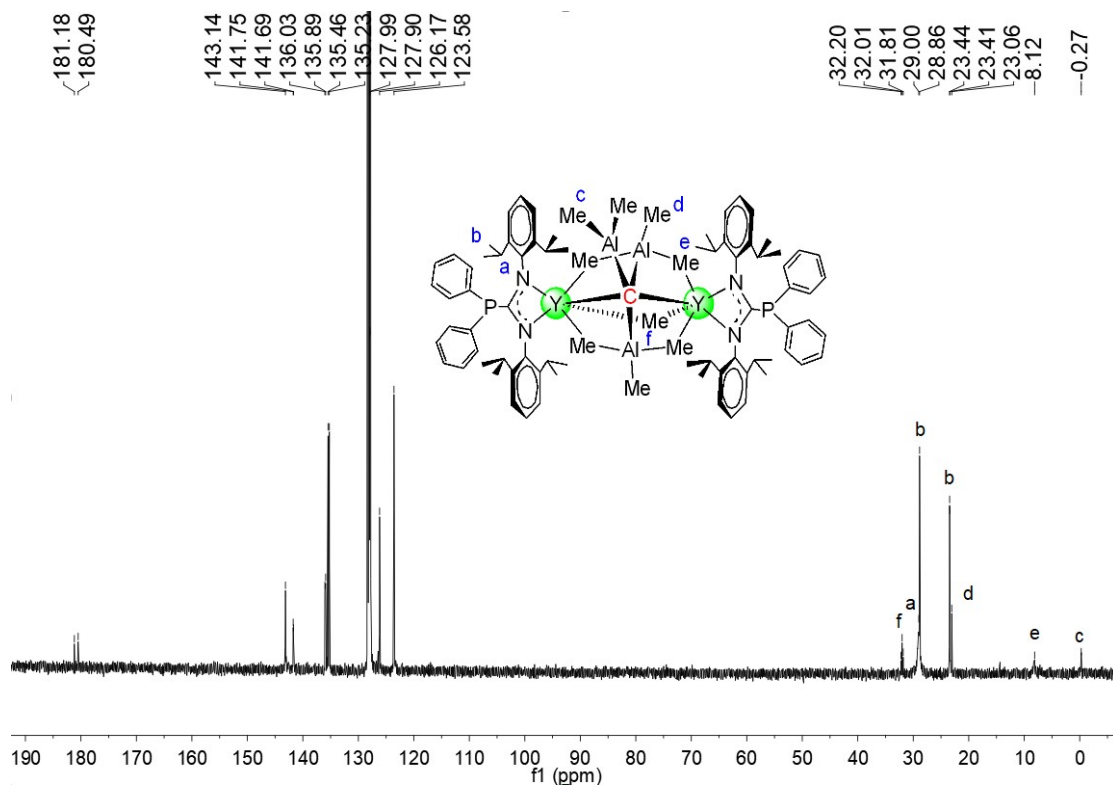

Figure S27.  $^{13}\text{C}\{^1\text{H}\}$  NMR spectrum of **8** obtained in  $\text{C}_6\text{D}_6$  at room temperature.



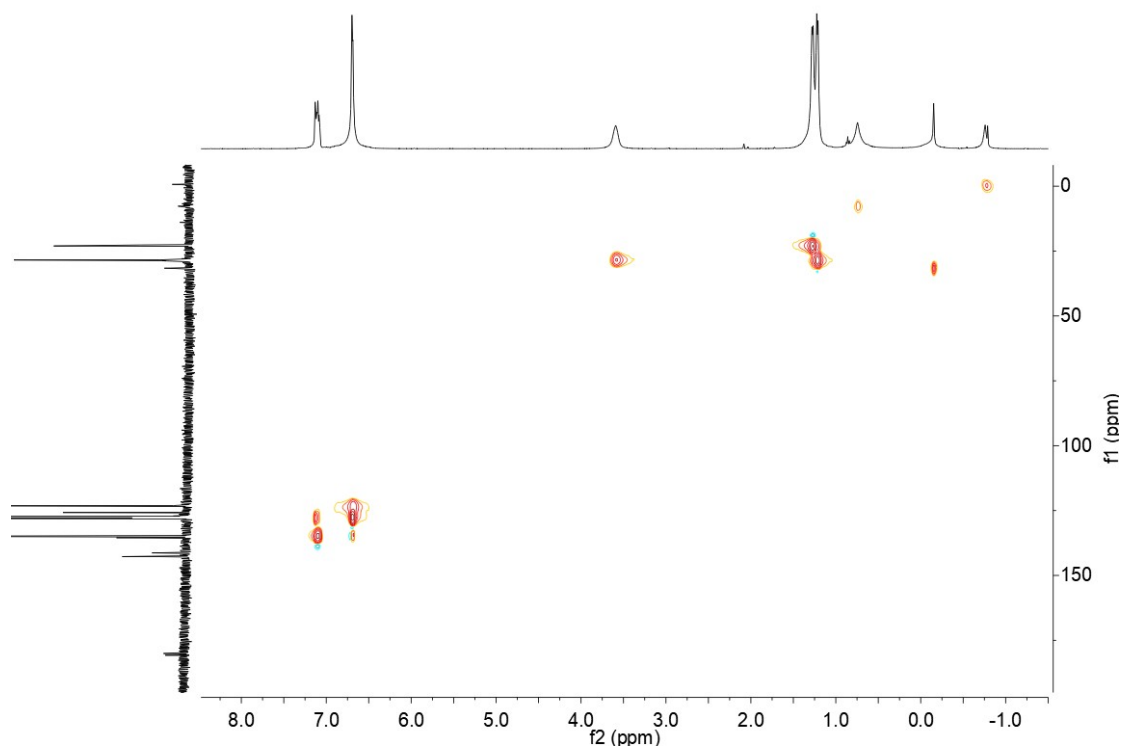

**Figure S28.** Two-dimensional  $^1\text{H}$ - $^{13}\text{C}$  HMQC NMR spectrum of complex **8** ( $^1\text{H}$  NMR spectrum (400 MHz) on the top,  $^{13}\text{C}\{^1\text{H}\}$  NMR spectrum (100 MHz) on the left).

-5.73

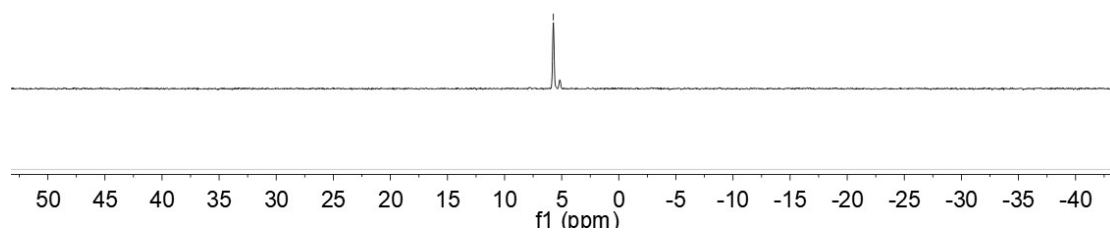

**Figure S29.**  $^{31}\text{P}\{^1\text{H}\}$  NMR spectrum of **8** obtained in  $\text{C}_6\text{D}_6$  at room temperature.

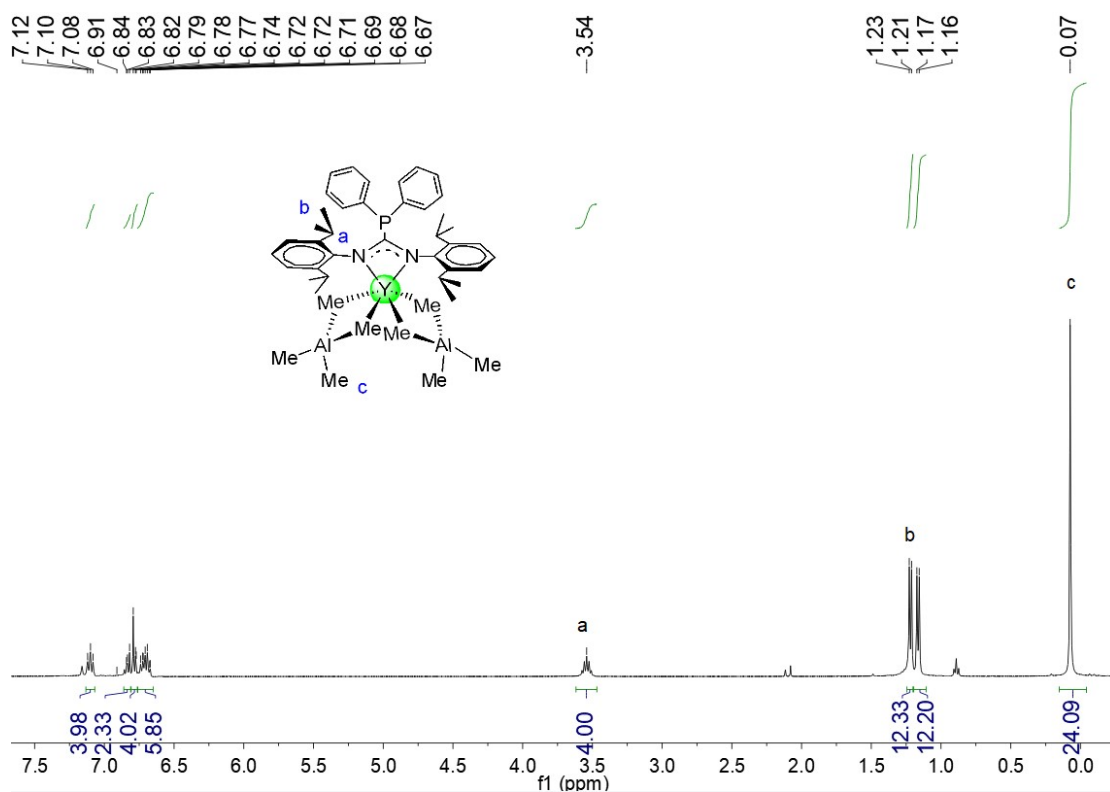

**Figure S30.**  $^1\text{H}$  NMR spectrum of **9** obtained in  $\text{C}_6\text{D}_6$  at room temperature.

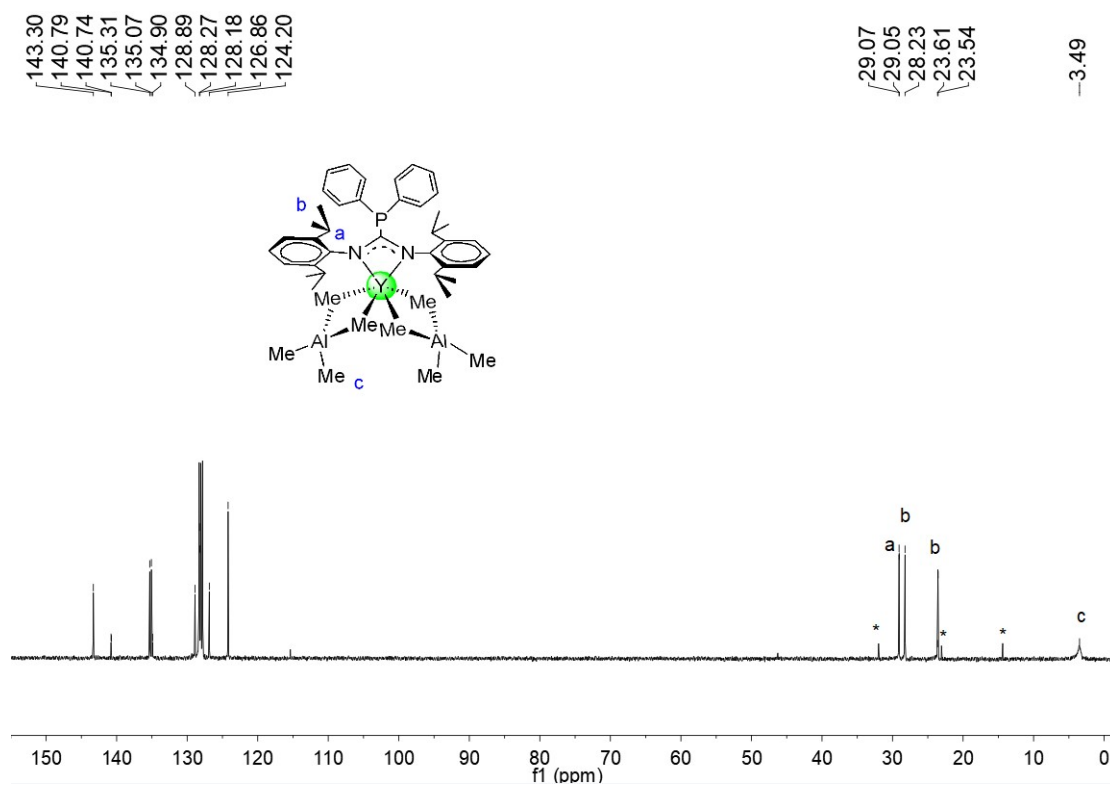

**Figure S31.**  $^{13}\text{C}\{^1\text{H}\}$  NMR spectrum of **9** obtained in  $\text{C}_6\text{D}_6$  at room temperature.

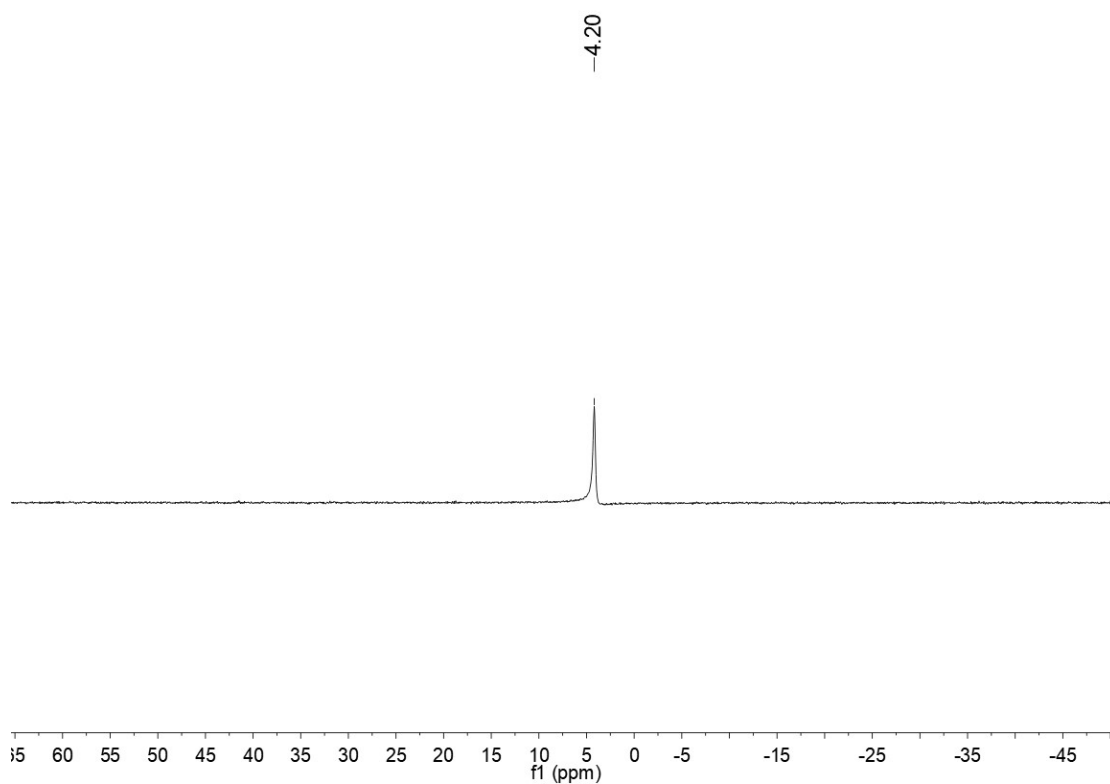

**Figure S32.**  $^{31}\text{P}\{^1\text{H}\}$  NMR spectrum of **9** obtained in  $\text{C}_6\text{D}_6$  at room temperature.

## X-ray Crystallographic structure determinations

All crystals for X-ray analysis were obtained as described in the preparations. Suitable crystals were sealed in the thin-wall glass capillaries under a microscope in the glovebox. Data collections were performed on a Bruker SMART APEX or Bruker SMART APEX II (at 173 K or 296 K) diffractometer with CCD area detector using graphite-monochromated Mo/Ga K $\alpha$  radiation ( $\lambda = 0.71073 \text{ \AA}$  /  $\lambda = 1.34138 \text{ \AA}$ ). The determination of crystal class and unit cell was carried out by using the SMART program package. The raw frame data were processed using SAINT<sup>[2]</sup> and SADABS<sup>[3]</sup> to yield the reflection data file. The structure was solved by using the SHELXTL program<sup>[4]</sup> Refinement was performed on  $F^2$  anisotropically by the full-matrix least-squares method for all the non-hydrogen atoms. The analytical scattering factors for neutral atoms were used throughout the analysis. Except for the hydrogen atoms on bridging carbons, hydrogen atoms were placed at the calculated positions and included in the structure calculation without further refinement of the parameters. The hydrogen atoms on bridging carbons were located by difference Fourier syntheses and their coordinates and isotropic parameters were refined. The residual electron densities were of no chemical significance. Crystal data, data collection, and processing parameters: 2389279 (for **1-Y**), 2389282 (for **1-Lu**), 2389309 (for **2**), 2389276 (for **4**), 2389280 (for **5**), 2389278 (for **6-Lu**), 2389281 (for **7**), 2389283 (for **8**) and 2389277 (for **9**) contain the supplementary crystallographic data for this paper. These data can be obtained free of charge from The Cambridge Crystallographic Data Centre *via* [www.ccdc.cam.ac.uk/datarequest/cif](http://www.ccdc.cam.ac.uk/datarequest/cif).

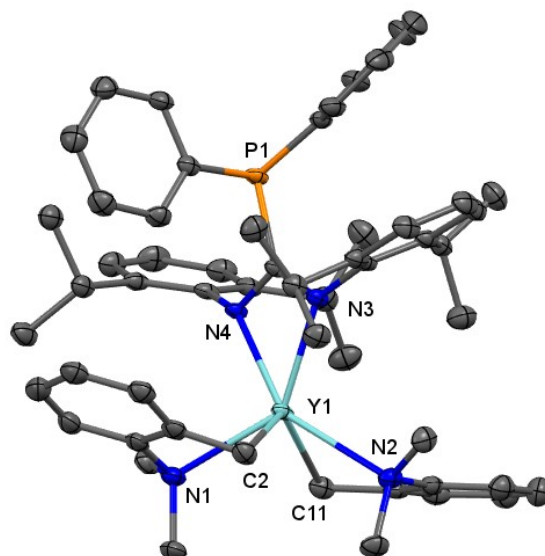

**Figure S33.** Molecular structure of complex **1-Y** with thermal ellipsoids at 30% probability. All hydrogen atoms are omitted for clarity. Selected bond lengths (Å) and angles (deg): Y(1)-C(2) 2.441(3), Y(1)-C(11) 2.436(3), Y(1)-N(1) 2.524(2), Y(1)-N(2) 2.607(2), Y(1)-N(3) 2.403(2), Y(1)-N(4) 2.475(2); C(2)-Y(1)-N(1) 68.47(8), N(1)-Y(1)-N(2) 117.76(7), N(1)-Y(1)-C(11) 84.57(9), N(2)-Y(1)-C(11) 67.32(8), C(2)-Y(1)-N(2) 81.04(8), C(2)-Y(1)-C(11) 121.88(10).

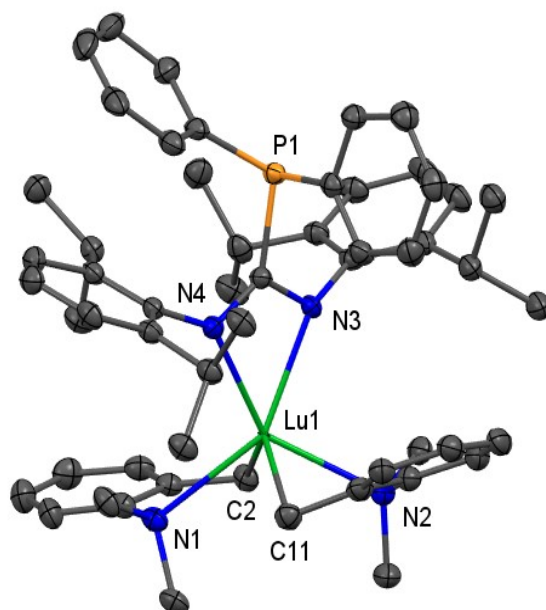

**Figure S34.** Molecular structure of complex **1-Lu** with thermal ellipsoids at 30% probability. All hydrogen atoms are omitted for clarity. Selected bond lengths (Å) and angles (deg): Lu(1)-C(2) 2.381(5), Lu(1)-C(11) 2.396(5), Lu(1)-N(2) 2.487(4), Lu(1)-N(1) 2.559(4), Lu(1)-N(3) 2.358(4), Lu(1)-N(4) 2.427(4); C(2)-Lu(1)-N(1) 68.39(15), N(1)-Lu(1)-N(2) 119.28(14), N(1)-Lu(1)-C(11) 81.93(16), N(2)-Lu(1)-C(11) 69.21(17), C(2)-Lu(1)-N(2) 85.23(17), C(2)-Lu(1)-C(11) 124.08(19).

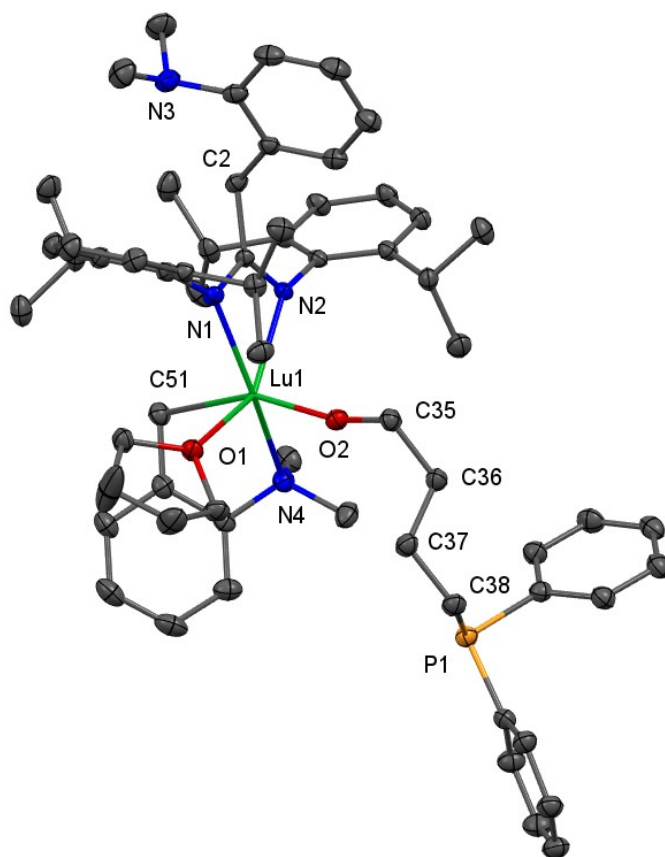

**Figure S35.** Molecular structure of complex **2** with thermal ellipsoids at 30% probability. All hydrogen atoms are omitted for clarity. Selected bond lengths (Å) and angles (deg): Lu(1)-N(1) 2.299(4), Lu(1)-N(2) 2.347(3), Lu(1)-N(4) 2.535(4), Lu(1)-O(2) 2.044(3), Lu(1)-O(1) 2.316(3), Lu(1)-C(51) 2.476(5); N(1)-Lu(1)-O(2) 107.70(13), N(2)-Lu(1)-O(2) 101.95(13), N(1)-Lu(1)-C(51) 95.68(15), N(2)-Lu(1)-C(51) 95.07(15), N(1)-Lu(1)-O(1) 88.49(12), N(2)-Lu(1)-O(1) 146.07(12).

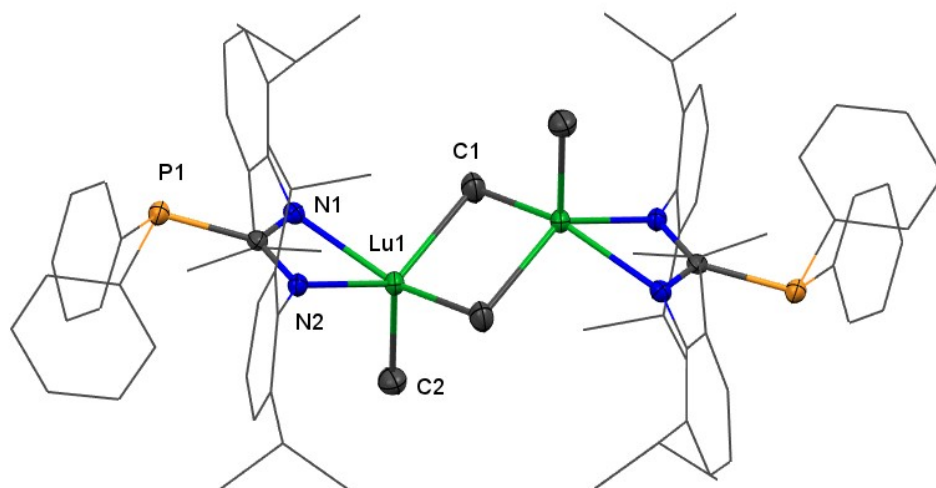

**Figure S36.** Molecular structure of complex **4** with thermal ellipsoids at 30% probability except for the 2,6-*(i*Pr)<sub>2</sub>C<sub>6</sub>H<sub>3</sub> groups and phenyl groups in the phosphaguanidinate ligand. All hydrogen atoms are omitted for clarity. Selected bond lengths (Å) and angles (deg): Lu(1)-Lu(1A) 3.3824(5), Lu(1)-N(1) 2.284(4), Lu(1)-N(2) 2.290(4), Lu(1)-C(1) 2.441(6), Lu(1)-C(1A) 2.428(6), Lu(1)-C(2) 2.297(6); N(1)-Lu(1)-N(2) 58.58(14), N(1)-Lu(1)-C(1) 141.64(19), N(1)-Lu(1)-C(2) 109.12(19), N(2)-Lu(1)-C(1) 93.35(17), N(2)-Lu(1)-C(2) 111.70(18), C(1)-Lu(1)-C(2) 105.4(2), C(1A)-Lu(1)-C(2) 110.7(2).



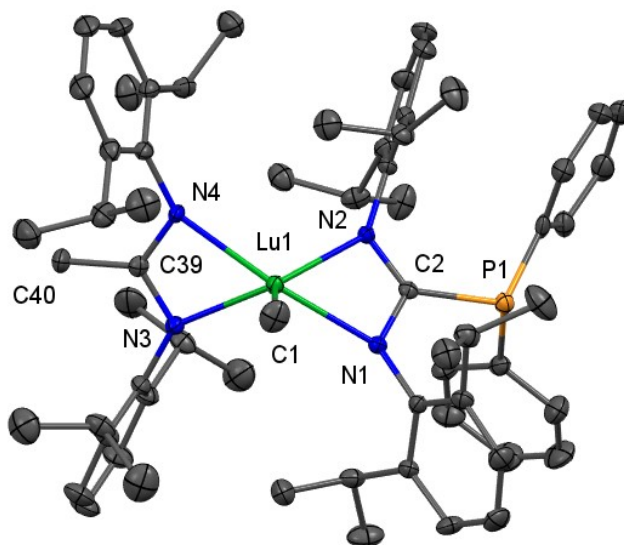

**Figure S37.** Molecular structure of complex **5** with thermal ellipsoids at 30% probability. All hydrogen atoms are omitted for clarity. Selected bond lengths (Å) and angles (deg): Lu(1)-N(1) 2.305(3), Lu(1)-N(2) 2.316(3), Lu(1)-N(3) 2.244(3), Lu(1)-N(4) 2.308(3), Lu(1)-C(1) 2.308(4), C(39)-C(40) 1.501(5), C(2)-P(1) 1.878(4); N(1)-Lu(1)-C(1) 93.43(15), N(2)-Lu(1)-C(1) 127.61(16), N(3)-Lu(1)-C(1) 107.38(16), N(4)-Lu(1)-C(1) 102.68(15), N(1)-Lu(1)-N(2) 57.84(11), N(3)-Lu(1)-N(4) 59.17(11).

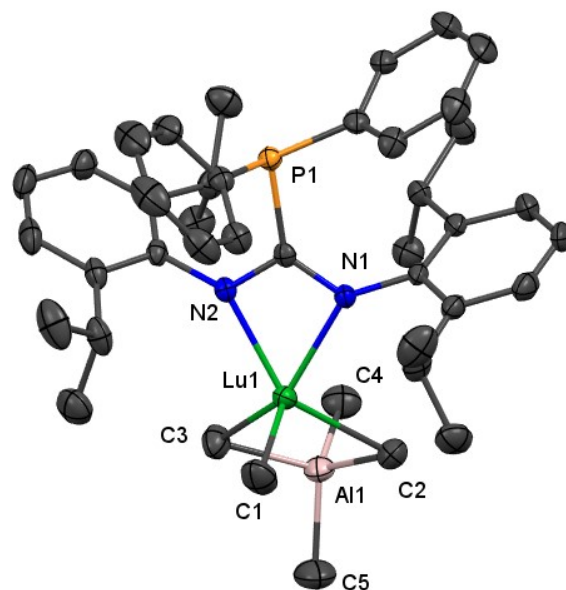

**Figure S38.** Molecular structure of complex **6-Lu** with thermal ellipsoids at 30% probability. All hydrogen atoms are omitted for clarity. Selected bond lengths (Å) and angles (deg): Lu(1)-C(1) 2.307(3), Lu(1)-C(2) 2.472(4), Lu(1)-C(3) 2.431(4), Al(1)-C(4) 1.959(3), Lu(1)-N(1) 2.276(2), Lu(1)-N(2) 2.273(2); C(1)-Lu(1)-N(1) 112.43(11), C(1)-Lu(1)-N(2) 111.55(11), C(1)-Lu(1)-C(2) 102.93(13), C(1)-Lu(1)-C(3) 105.83(14).

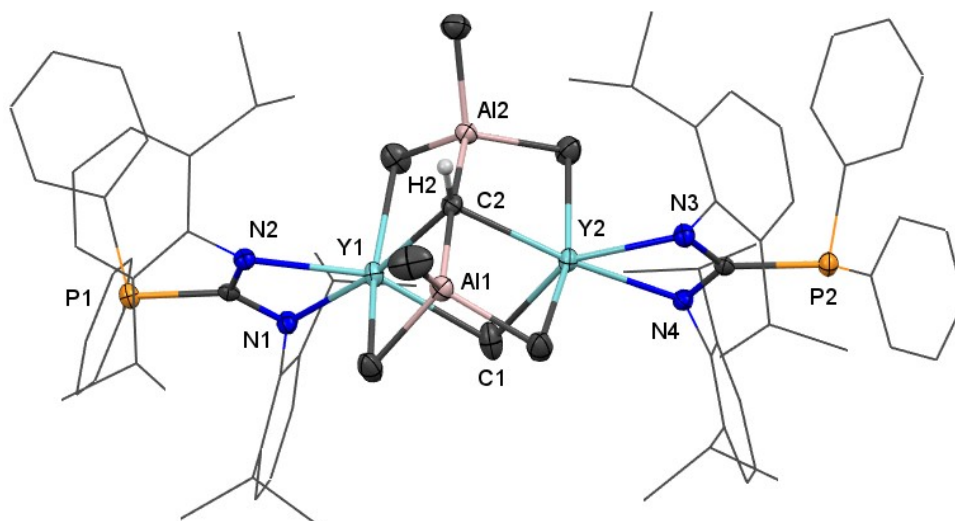

**Figure S39.** Molecular structure of complex **7** with thermal ellipsoids at 30% probability except for the 2,6-*i*Pr<sub>2</sub>C<sub>6</sub>H<sub>3</sub> groups and phenyl groups in the phosphaguanidinate ligand. All hydrogen atoms are omitted for clarity (except for H2). Selected bond lengths (Å) and angles (deg): Y(1)-C(1) 2.538(3), Y(1)-C(2) 2.390(2), Y(2)-C(1) 2.508(3), Y(2)-C(2) 2.414(2), C(2)-Al(1) 1.992(3), C(2)-Al(2) 1.983(3), Y(1)-C(3) 2.593(3), Y(1)-C(6) 2.646(3), Y(2)-C(5) 2.601(3), Y(2)-C(8) 2.609(3); C(1)-Y(1)-C(2) 85.28(9), C(1)-Y(2)-C(2) 85.42(9), Y(1)-C(1)-Y(2) 91.50(11), Y(1)-C(2)-Y(2) 97.58(8).

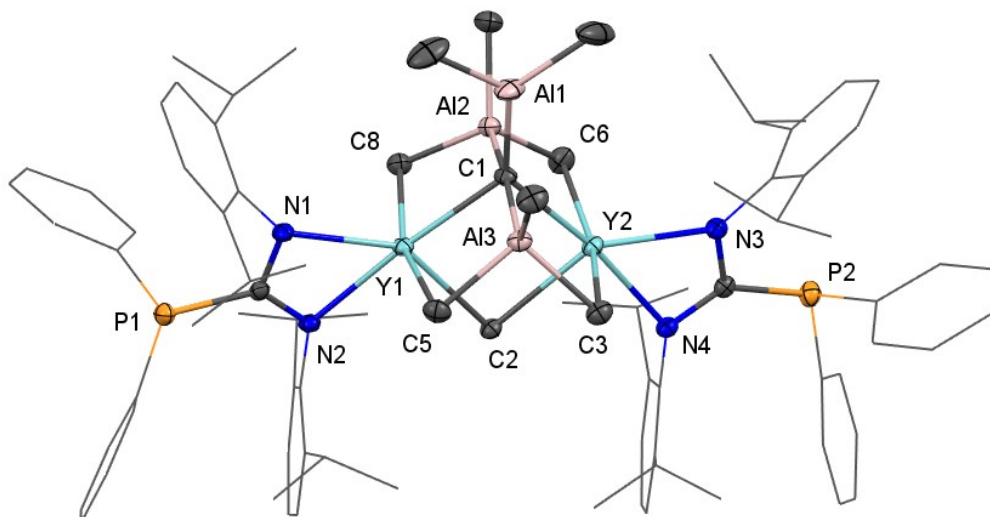

**Figure S40.** Molecular structure of complex **8** with thermal ellipsoids at 30% probability except for the 2,6-*i*Pr<sub>2</sub>C<sub>6</sub>H<sub>3</sub> groups and phenyl groups in the phosphaguanidinate ligand. All hydrogen atoms are omitted for clarity. Selected bond lengths (Å) and angles (deg): Y(1)-Y(2) 3.6371(5), Y(1)-C(1) 2.429(3), Y(1)-C(2) 2.597(3), Y(1)-C(5) 2.574(3), Y(1)-C(8) 2.562(3), Y(2)-C(3) 2.620(3), Y(2)-C(6) 2.583(3), Y(2)-C(1) 2.421(3), Y(2)-C(2) 2.566(2), C(1)-Al(1) 1.939(3), C(1)-Al(2) 1.973(3), C(1)-Al(3) 1.972(3); C(1)-Y(1)-C(2) 86.18(9), C(1)-Y(2)-C(2) 87.05(9), Y(1)-C(1)-Y(2) 97.17(9), Y(1)-C(2)-Y(2) 89.57(8), Al(1)-C(1)-Al(2) 93.82(12), Al(1)-C(1)-Al(3) 96.52(12), Al(2)-C(1)-Al(3) 169.63(15).

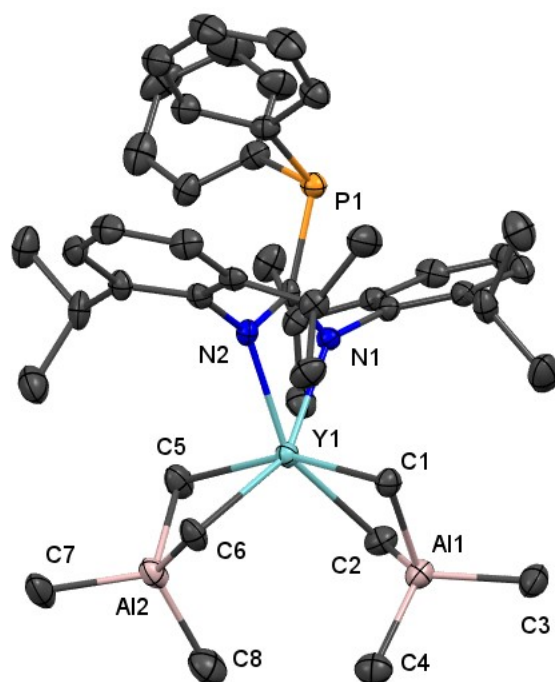

**Figure S41.** Molecular structure of complex **9** with thermal ellipsoids at 30% probability. All hydrogen atoms are omitted for clarity. Selected bond lengths (Å) and angles (deg): Y(1)-N(1) 2.326(4), Y(1)-N(2) 2.351(4), Y(1)-C(1) 2.528(4), Y(1)-C(2) 2.558(4), Y(1)-C(5) 2.541(4), Y(1)-C(6) 2.570(4); C(1)-Y(1)-N(1) 103.90(11), C(1)-Y(1)-N(2) 97.65(11), C(2)-Y(1)-N(1) 94.93(12), C(2)-Y(1)-N(2) 150.89(13), C(5)-Y(1)-N(1) 96.19(11), C(5)-Y(1)-N(2) 99.99(12), C(6)-Y(1)-N(1) 151.81(13), C(6)-Y(1)-N(2) 95.77(12), C(1)-Y(1)-C(2) 79.89(13), C(5)-Y(1)-C(6) 79.65(13).

**Table S1.** Crystal data and refinement details of complexes **1-Y**, **1-Lu** and **2**

|                                                                                                                                                                                                                                                                                                   | <b>1-Y</b>                                                            | <b>1-Lu</b>                                                         | <b>2</b>                                                              |
|---------------------------------------------------------------------------------------------------------------------------------------------------------------------------------------------------------------------------------------------------------------------------------------------------|-----------------------------------------------------------------------|---------------------------------------------------------------------|-----------------------------------------------------------------------|
| Formula                                                                                                                                                                                                                                                                                           | C <sub>55</sub> H <sub>68</sub> N <sub>4</sub> PY                     | C <sub>55</sub> H <sub>68</sub> N <sub>4</sub> PLu                  | C <sub>63</sub> H <sub>84</sub> LuN <sub>4</sub> O <sub>2</sub> P     |
| Molecular weight                                                                                                                                                                                                                                                                                  | 905.01                                                                | 991.07                                                              | 1135.28                                                               |
| Crystal system                                                                                                                                                                                                                                                                                    | Monoclinic                                                            | Monoclinic                                                          | Triclinic                                                             |
| Space group                                                                                                                                                                                                                                                                                       | <i>P2</i> <sub>1</sub> / <i>n</i>                                     | <i>P2</i> <sub>1</sub> / <i>n</i>                                   | <i>P</i> -1                                                           |
| <i>a</i> / (Å)                                                                                                                                                                                                                                                                                    | 15.5692(14)                                                           | 15.5704(6)                                                          | 10.7810(7)                                                            |
| <i>b</i> / (Å)                                                                                                                                                                                                                                                                                    | 18.5082(16)                                                           | 18.4527(6)                                                          | 12.3125(8)                                                            |
| <i>c</i> / (Å)                                                                                                                                                                                                                                                                                    | 16.5373(15)                                                           | 16.5098(6)                                                          | 23.2922(15)                                                           |
| <i>V</i> / (Å <sup>3</sup> )                                                                                                                                                                                                                                                                      | 4722.5(7)                                                             | 4698.0(3)                                                           | 4305.7(5)                                                             |
| <i>Z</i>                                                                                                                                                                                                                                                                                          | 4                                                                     | 4                                                                   | 2                                                                     |
| $\rho_c$ / (mg. m <sup>-3</sup> )                                                                                                                                                                                                                                                                 | 1.273                                                                 | 1.401                                                               | 1.321                                                                 |
| $\mu$ (Mo-K $\alpha$ )/(mm <sup>-1</sup> )                                                                                                                                                                                                                                                        | 1.568                                                                 | 3.058                                                               | 2.577                                                                 |
| Limiting indices                                                                                                                                                                                                                                                                                  | -18<= <i>h</i> <=18, -<br>22<= <i>k</i> <=22, -<br>19<= <i>l</i> <=19 | -19<= <i>h</i> <=19,<br>-22<= <i>k</i> <=23,<br>-20<= <i>l</i> <=20 | -12<= <i>h</i> <=12, -<br>14<= <i>k</i> <=14, -<br>27<= <i>l</i> <=27 |
| Collected reflections                                                                                                                                                                                                                                                                             | 53122                                                                 | 71428                                                               | 72131                                                                 |
| Unique                                                                                                                                                                                                                                                                                            | 8349                                                                  | 10102                                                               | 10086                                                                 |
|                                                                                                                                                                                                                                                                                                   | [R(int)= 0.1093]                                                      | [R(int)= 0.1177]                                                    | [R(int) = 0.0701]                                                     |
| Parameters                                                                                                                                                                                                                                                                                        | 570                                                                   | 562                                                                 | 652                                                                   |
| Goodness of fit on <i>F</i> <sup>2</sup>                                                                                                                                                                                                                                                          | 1.043                                                                 | 1.053                                                               | 1.219                                                                 |
| <i>R</i> <sub>1</sub> <sup>a</sup> , <i>wR</i> <sub>2</sub> <sup>a</sup> [ <i>I</i> > 2 $\sigma$ ( <i>I</i> )]                                                                                                                                                                                    | <i>R</i> <sub>1</sub> = 0.0439<br><i>wR</i> <sub>2</sub> = 0.1111     | <i>R</i> <sub>1</sub> = 0.0613<br><i>wR</i> <sub>2</sub> = 0.1596   | <i>R</i> <sub>1</sub> = 0.0445<br><i>wR</i> <sub>2</sub> = 0.1166     |
| <i>R</i> <sub>1</sub> , <i>wR</i> <sub>2</sub> indices (all data)                                                                                                                                                                                                                                 | <i>R</i> <sub>1</sub> = 0.0519<br><i>wR</i> <sub>2</sub> = 0.1178     | <i>R</i> <sub>1</sub> = 0.0712<br><i>wR</i> <sub>2</sub> = 0.1659   | <i>R</i> <sub>1</sub> = 0.0466<br><i>wR</i> <sub>2</sub> = 0.1174     |
| Max/min residual density(e Å <sup>-3</sup> )                                                                                                                                                                                                                                                      | 1.00 and -0.51                                                        | 1.27 and -2.19                                                      | 0.90 and -1.00                                                        |
| <sup>a</sup> <i>R</i> <sub>1</sub> = $\sum    F_0  -  F_c   $ (based on reflections with $F_0^2 > 2\sigma F^2$ ). $wR_2 = [\sum [w(F_0^2 - F_c^2)^2] / \sum [w(F_0^2)^2]]^{1/2}$ ; $w = 1/[\sigma^2(F_0^2) + (0.095P)^2]$ ; $P = [\max(F_0^2, 0) + 2F_c^2]/3$ (also with $F_0^2 > 2\sigma F^2$ ). |                                                                       |                                                                     |                                                                       |

**Table S2.** Crystal data and refinement details of complexes **4**, **5** and **6-Lu**

|                                                                                                                                                                                                                                                                                                  | <b>4</b>                                                                       | <b>5</b>                                                            | <b>6-Lu</b>                                                           |
|--------------------------------------------------------------------------------------------------------------------------------------------------------------------------------------------------------------------------------------------------------------------------------------------------|--------------------------------------------------------------------------------|---------------------------------------------------------------------|-----------------------------------------------------------------------|
| Formula                                                                                                                                                                                                                                                                                          | C <sub>92</sub> H <sub>110</sub> Lu <sub>2</sub> N <sub>4</sub> P <sub>2</sub> | C <sub>64</sub> H <sub>85</sub> LuN <sub>4</sub> P                  | C <sub>42</sub> H <sub>59</sub> AlLuN <sub>2</sub> P                  |
| Molecular weight                                                                                                                                                                                                                                                                                 | 1683.72                                                                        | 1116.29                                                             | 824.83                                                                |
| Crystal system                                                                                                                                                                                                                                                                                   | Triclinic                                                                      | Monoclinic                                                          | Monoclinic                                                            |
| Space group                                                                                                                                                                                                                                                                                      | <i>P</i> -1                                                                    | <i>P</i> 2 <sub>1</sub> / <i>c</i>                                  | <i>P</i> 2 <sub>1</sub> / <i>n</i>                                    |
| <i>a</i> / (Å)                                                                                                                                                                                                                                                                                   | 10.5399(4)                                                                     | 12.962(8)                                                           | 12.7487(5)                                                            |
| <i>b</i> / (Å)                                                                                                                                                                                                                                                                                   | 11.7073(5)                                                                     | 19.845(8)                                                           | 18.7568(7)                                                            |
| <i>c</i> / (Å)                                                                                                                                                                                                                                                                                   | 19.0482(8)                                                                     | 22.439(7)                                                           | 17.9516(7)                                                            |
| <i>V</i> / (Å <sup>3</sup> )                                                                                                                                                                                                                                                                     | 2094.24(15)                                                                    | 5704(6)                                                             | 4288.6(3)                                                             |
| <i>Z</i>                                                                                                                                                                                                                                                                                         | 2                                                                              | 4                                                                   | 4                                                                     |
| $\rho_c$ / (mg. m <sup>-3</sup> )                                                                                                                                                                                                                                                                | 1.340                                                                          | 1.300                                                               | 1.277                                                                 |
| $\mu$ (Mo-K $\alpha$ )/(mm <sup>-1</sup> )                                                                                                                                                                                                                                                       | 2.427                                                                          | 1.801                                                               | 2.388                                                                 |
| Limiting indices                                                                                                                                                                                                                                                                                 | -12 ≤ <i>h</i> ≤ 12, -<br>13 ≤ <i>k</i> ≤ 13, -<br>22 ≤ <i>l</i> ≤ 22          | -15 ≤ <i>h</i> ≤ 15,<br>-23 ≤ <i>k</i> ≤ 23,<br>-25 ≤ <i>l</i> ≤ 26 | -14 ≤ <i>h</i> ≤ 15, -<br>22 ≤ <i>k</i> ≤ 22, -<br>21 ≤ <i>l</i> ≤ 21 |
| Collected reflections                                                                                                                                                                                                                                                                            | 44234                                                                          | 59596                                                               | 45965                                                                 |
| Unique                                                                                                                                                                                                                                                                                           | 7409<br>[R(int)= 0.0544]                                                       | 10112<br>[R(int)= 0.0817]                                           | 7578<br>[R(int) = 0.0436]                                             |
| Parameters                                                                                                                                                                                                                                                                                       | 473                                                                            | 649                                                                 | 459 <sup>□</sup>                                                      |
| Goodness of fit on <i>F</i> <sup>2</sup>                                                                                                                                                                                                                                                         | 1.200                                                                          | 1.051                                                               | 1.100                                                                 |
| <i>R</i> <sub>1</sub> <sup>a</sup> , <i>wR</i> <sub>2</sub> <sup>a</sup> [ <i>I</i> > 2σ( <i>I</i> )]                                                                                                                                                                                            | <i>R</i> <sub>1</sub> = 0.0372<br><i>wR</i> <sub>2</sub> = 0.0803              | <i>R</i> <sub>1</sub> = 0.0320<br><i>wR</i> <sub>2</sub> = 0.0654   | <i>R</i> <sub>1</sub> = 0.0218<br><i>wR</i> <sub>2</sub> = 0.0438     |
| <i>R</i> <sub>1</sub> , <i>wR</i> <sub>2</sub> indices (all data)                                                                                                                                                                                                                                | <i>R</i> <sub>1</sub> = 0.0430<br><i>wR</i> <sub>2</sub> = 0.0829              | <i>R</i> <sub>1</sub> = 0.0566<br><i>wR</i> <sub>2</sub> = 0.0778   | <i>R</i> <sub>1</sub> = 0.0313<br><i>wR</i> <sub>2</sub> = 0.0500     |
| Max/min residual density (e Å <sup>-3</sup> )                                                                                                                                                                                                                                                    | 1.45 and -1.54                                                                 | 0.91 and -0.90                                                      | 0.33 and -0.79                                                        |
| <sup>a</sup> <i>R</i> <sub>1</sub> = $\sum    F_0  -  F_c  $ (based on reflections with $F_o^2 > 2\sigma F^2$ ). $wR_2 = [\sum [w(F_o^2 - F_c^2)^2] / \sum [w(F_o^2)^2]]^{1/2}$ ; $w = 1/[\sigma^2(F_o^2) + (0.095P)^2]$ ; $P = [\max(F_o^2, 0) + 2F_c^2]/3$ (also with $F_o^2 > 2\sigma F^2$ ). |                                                                                |                                                                     |                                                                       |

**Table S3.** Crystal data and refinement details of complexes **7**, **8** and **9**

|                                                                                                                                                                                                                                                                                                                                  | <b>7</b>                                                                                      | <b>8</b>                                                                                      | <b>9</b>                                                           |
|----------------------------------------------------------------------------------------------------------------------------------------------------------------------------------------------------------------------------------------------------------------------------------------------------------------------------------|-----------------------------------------------------------------------------------------------|-----------------------------------------------------------------------------------------------|--------------------------------------------------------------------|
| Formula                                                                                                                                                                                                                                                                                                                          | C <sub>82</sub> H <sub>110</sub> Al <sub>2</sub> N <sub>4</sub> P <sub>2</sub> Y <sub>2</sub> | C <sub>84</sub> H <sub>115</sub> Al <sub>3</sub> N <sub>4</sub> P <sub>2</sub> Y <sub>2</sub> | C <sub>45</sub> H <sub>68</sub> Al <sub>2</sub> N <sub>2</sub> PY  |
| Molecular weight                                                                                                                                                                                                                                                                                                                 | 1445.45                                                                                       | 1501.49                                                                                       | 810.85                                                             |
| Crystal system                                                                                                                                                                                                                                                                                                                   | Triclinic                                                                                     | Monoclinic                                                                                    | Monoclinic                                                         |
| Space group                                                                                                                                                                                                                                                                                                                      | <i>P</i> -1                                                                                   | <i>P</i> 2 <sub>1</sub> / <i>n</i>                                                            | <i>P</i> 2 <sub>1</sub> / <i>c</i>                                 |
| <i>a</i> / (Å)                                                                                                                                                                                                                                                                                                                   | 12.0176(6)                                                                                    | 19.8360(19)                                                                                   | 16.1150(14)                                                        |
| <i>b</i> / (Å)                                                                                                                                                                                                                                                                                                                   | 18.7006(11)                                                                                   | 12.2333(12)                                                                                   | 16.9001(16)                                                        |
| <i>c</i> / (Å)                                                                                                                                                                                                                                                                                                                   | 19.4040(11)                                                                                   | 34.501(3)                                                                                     | 19.322(2)                                                          |
| <i>V</i> / (Å <sup>3</sup> )                                                                                                                                                                                                                                                                                                     | 3899.7(4)                                                                                     | 8352.7(14)                                                                                    | 4872.5(8)                                                          |
| <i>Z</i>                                                                                                                                                                                                                                                                                                                         | 2                                                                                             | 4                                                                                             | 4                                                                  |
| $\rho_c$ / (mg. m <sup>-3</sup> )                                                                                                                                                                                                                                                                                                | 1.231                                                                                         | 1.194                                                                                         | 1.105                                                              |
| $\mu$ (Mo-K $\alpha$ )/(mm <sup>-1</sup> )                                                                                                                                                                                                                                                                                       | 1.588                                                                                         | 1.886                                                                                         | 1.294                                                              |
| Limiting indices                                                                                                                                                                                                                                                                                                                 | -14 ≤ <i>h</i> ≤ 14 -<br>22 ≤ <i>k</i> ≤ 22<br>-23 ≤ <i>l</i> ≤ 23                            | -23 ≤ <i>h</i> ≤ 23<br>-14 ≤ <i>k</i> ≤ 14<br>-41 ≤ <i>l</i> ≤ 41                             | -19 ≤ <i>h</i> ≤ 19<br>-20 ≤ <i>k</i> ≤ 20 -<br>23 ≤ <i>l</i> ≤ 20 |
| Collected reflections                                                                                                                                                                                                                                                                                                            | 85131                                                                                         | 144943                                                                                        | 41269                                                              |
| Unique                                                                                                                                                                                                                                                                                                                           | 13652<br>[ <i>R</i> (int) = 0.0978]                                                           | 14774<br>[ <i>R</i> (int) = 0.0756]                                                           | 8614<br>[ <i>R</i> (int) = 0.0943]                                 |
| Parameters                                                                                                                                                                                                                                                                                                                       | 911 $\square$                                                                                 | 930 $\square$                                                                                 | 520 $\square$                                                      |
| Goodness of fit on <i>F</i> <sup>2</sup>                                                                                                                                                                                                                                                                                         | 1.044                                                                                         | 1.029                                                                                         | 1.038                                                              |
| <i>R</i> <sub>1</sub> <sup>a</sup> , <i>wR</i> <sub>2</sub> <sup>a</sup> [ <i>I</i> > 2 $\sigma$ ( <i>I</i> )]                                                                                                                                                                                                                   | <i>R</i> <sub>1</sub> = 0.0363<br><i>wR</i> <sub>2</sub> = 0.0798                             | <i>R</i> <sub>1</sub> = 0.0418<br><i>wR</i> <sub>2</sub> = 0.0985                             | <i>R</i> <sub>1</sub> = 0.0464<br><i>wR</i> <sub>2</sub> = 0.1078  |
| <i>R</i> <sub>1</sub> , <i>wR</i> <sub>2</sub> indices (all data)                                                                                                                                                                                                                                                                | <i>R</i> <sub>1</sub> = 0.0533<br><i>wR</i> <sub>2</sub> = 0.0867                             | <i>R</i> <sub>1</sub> = 0.0506<br><i>wR</i> <sub>2</sub> = 0.1053                             | <i>R</i> <sub>1</sub> = 0.0776<br><i>wR</i> <sub>2</sub> = 0.1208  |
| Max/min residual density (e Å <sup>-3</sup> )                                                                                                                                                                                                                                                                                    | 0.34 and -0.50                                                                                | 2.89 and -0.63                                                                                | 0.41 and -0.48                                                     |
| <sup>a</sup> <i>R</i> <sub>1</sub> = $\sum    F_0  -  F_c  $ (based on reflections with $F_o^2 > 2\sigma F^2$ ). <i>wR</i> <sub>2</sub> = $[\sum [w(F_o^2 - F_c^2)^2] / \sum [w(F_o^2)^2]]^{1/2}$ ; <i>w</i> = $1/[\sigma^2(F_o^2) + (0.095P)^2]$ ; <i>P</i> = $[\max(F_o^2, 0) + 2F_c^2]/3$ (also with $F_o^2 > 2\sigma F^2$ ). |                                                                                               |                                                                                               |                                                                    |



## References

- [1] J. Grundy, M. P. Coles, P. B. Hitchcock, *Dalton Trans.*, **2003**, 2573–2577; b) N. E. Mansfield, M. P. Coles, P. B. Hitchcock, *Dalton Trans.*, **2005**, 2833–2841.
- [2] *SAINTPlus Data Reduction and Correction Program* v. 6.02a, Bruker AXS, Madison, WI, **2000**.
- [3] G. M. Sheldrick, *SADABS*, A Program for Empirical Absorption Correction, University of Göttingen, Göttingen, Germany, **1998**.
- [4] G. M. Sheldrick, *SHELXL-97*, Program for the Refinement of Crystal Structures, University of Göttingen, Göttingen, Germany, **1997**.
